# Supplementary material for: Synthesis and structure of 3-arylazo derivatives of ortho-carborane
Source: Royal Society of Chemistry journal article supplement (doi:10.1039/d0nj02052d), 2020-01-01
Supplement: d0nj02052d1.pdf [file d0nj02052d1.pdf]

## Supplementary information

# Synthesis and structure of 3-aryldiazo derivatives of *ortho*-carborane

Akim V. Shmalko,<sup>a</sup> Sergei A. Anufriev,<sup>a</sup> Marina Yu. Stogniy,<sup>a</sup> Kyrill Yu. Suponitsky<sup>ab</sup>  
and Igor B. Sivaev<sup>a\*</sup>

<sup>a</sup> A.N.Nesmeyanov Institute of Organoelement Compounds, Russian Academy of Sciences,  
28 Vavilov Str., Moscow, 119991, Russia. E-mail: sivaev@ineos.ac.ru

<sup>b</sup> N.S.Kurnakov Institute of General and Inorganic Chemistry, Russian Academy of Sciences,  
31 Leninskii Prosp., Moscow, 119991, Russia

### Materials and Instruments.

3-Diazonium derivative of *ortho*-carborane [3-N<sub>2</sub>-*o*-C<sub>2</sub>B<sub>10</sub>H<sub>11</sub>][BF<sub>4</sub>] [1] and Grignard reagents 4-BrMgC<sub>6</sub>H<sub>4</sub>NMe<sub>2</sub> [2] and 2-BrMgC<sub>6</sub>H<sub>4</sub>Me [3] were prepared according to the literature procedures. 4-Methoxyphenylmagnesium bromide (1.0 M in THF) and cesium fluoride were purchased from Sigma-Aldrich and P&M Invest, respectively. Tetrahydrofuran and diethyl ether were dried as described in the literature [4]. Analytical TLC was performed using silica gel on aluminum plates Merck F254 and visualized with 0.5 % PdCl<sub>2</sub> in 1% HCl in aq. MeOH (1:10). Acros Organics silica gel (0.060–0.200 mm) was used for column chromatography. The NMR spectra at 400.1 MHz (<sup>1</sup>H), 128.4 MHz (<sup>11</sup>B) and 100.0 MHz (<sup>13</sup>C) were recorded with Bruker Avance-400 and Varian Inova-400 spectrometers. Chemical shifts for <sup>1</sup>H and <sup>13</sup>C NMR spectra were referenced to Me<sub>4</sub>Si as an internal standard. Chemical shifts values for <sup>11</sup>B NMR spectra were referenced relative to external BF<sub>3</sub>·Et<sub>2</sub>O. Infrared spectra were recorded on an IR Prestige-21 (SHIMADZU) instrument. Adsorption spectra were registered using spectrophotometer SF-2000 (LOMO, Russia). High resolution mass spectra (HRMS) were measured on a Bruker micrOTOF II instrument using electrospray ionization (ESI). The measurements were done in a negative ion mode, mass range from *m/z* 50 to *m/z* 3000.

### 3-(4'-N,N-dimethylaminophenyldiazo)-1,2-dicarba-*closo*-dodecarborane 3-(4'-Me<sub>2</sub>N-C<sub>6</sub>H<sub>4</sub>N=N)-1,2-C<sub>2</sub>B<sub>10</sub>H<sub>11</sub> (1)

130 mg (0.5 mmol) [3-N<sub>2</sub>-*o*-C<sub>2</sub>B<sub>10</sub>H<sub>11</sub>][BF<sub>4</sub>] was placed in a 25 mL two-neck flask under argon atmosphere, cooled to –78 °C and THF (10 mL) was added. Then a 0.5 M solution of *p*-Me<sub>2</sub>NC<sub>6</sub>H<sub>4</sub>MgBr in THF (3 mL, 1.5 mmol) was added dropwise to the flask. The reaction

mixture immediately darkened, and cooling bath was removed. The reaction was stirred overnight, then water (20 mL) was added. The product was extracted with diethyl ether (3×20 mL). The organic fractions were separated, combined, dried over Na<sub>2</sub>SO<sub>4</sub>, filtered, and concentrated on a rotary evaporator. The residue was washed with hot hexane (3×10 mL), the filtrate was evaporated and subjected to column chromatography on silica (eluent diethyl ether—petroleum ether, 2 : 1 (v/v)). The first, second and third fractions were collected and concentrated on a rotary evaporator to obtain compounds **1** (78 mg, 54%), **1a** (24 mg, 21%) and **1b** (29 mg, 20%), respectively.

**Compound 1.** <sup>1</sup>H NMR (CDCl<sub>3</sub>, ppm): 7.74 (2H, d, *J* = 9.1 Hz, C<sub>6</sub>H<sub>4</sub>), 6.70 (2H, d, *J* = 9.1 Hz, C<sub>6</sub>H<sub>4</sub>), 3.82 (2H, br.s, CH<sub>carb.</sub>), 3.10 (6H, s, N(CH<sub>3</sub>)<sub>2</sub>). <sup>11</sup>B NMR (CDCl<sub>3</sub>, ppm): -2.6 (1B, s), -3.2 (2B, d, *J* = 152 Hz), -9.8 (1B, d, *J* = 158 Hz), -13.6 (6B, d, *J* = 156 Hz). IR (CHCl<sub>3</sub>, cm<sup>-1</sup>): 3060 (C<sub>carb</sub>-H), 3043 (C<sub>aryl</sub>-H), 2952-2808 (C<sub>Me</sub>-H), 2640, 2590 (B-H), 1603 ((C=C)<sub>aryl</sub>). UV (CHCl<sub>3</sub>, nm): 461.

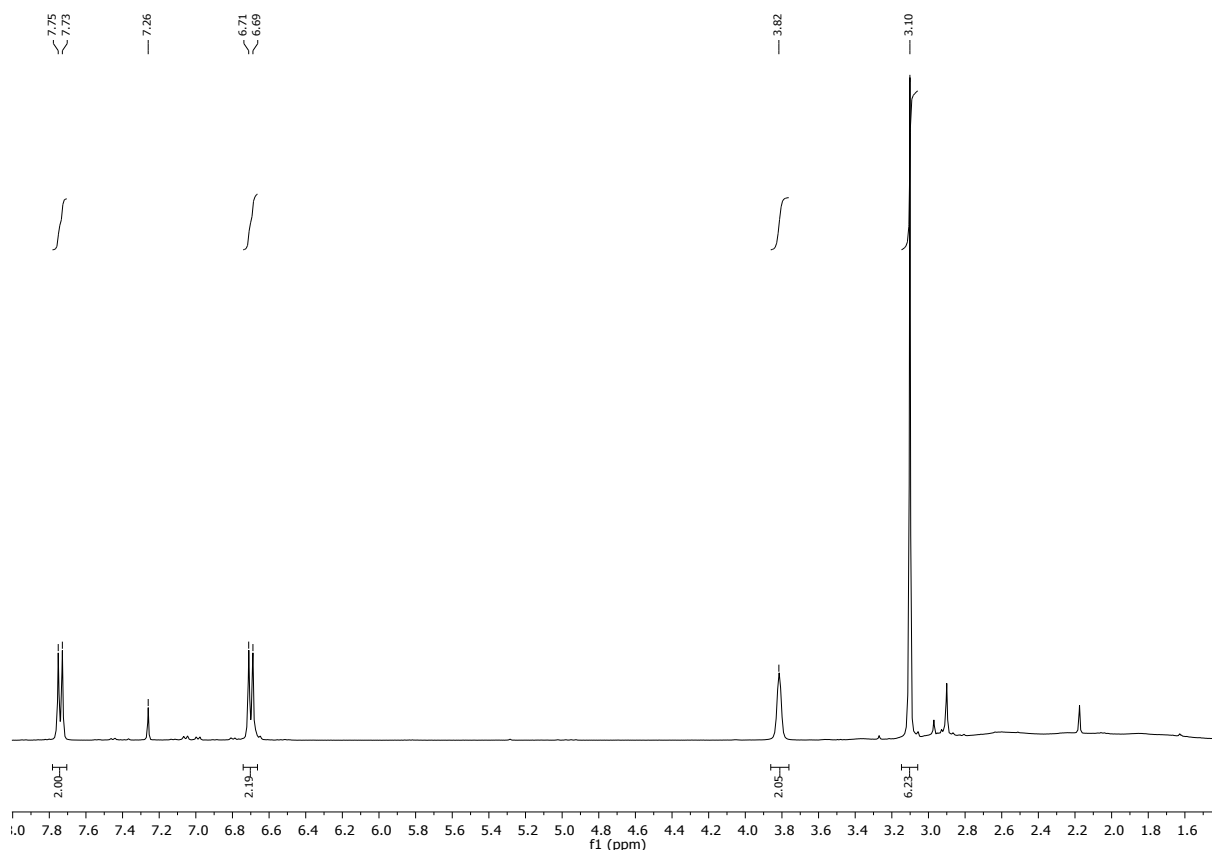

Fig. S1. <sup>1</sup>H NMR spectrum of 3-(4'-Me<sub>2</sub>N-C<sub>6</sub>H<sub>4</sub>N=N)-1,2-C<sub>2</sub>B<sub>10</sub>H<sub>11</sub> (**1**).

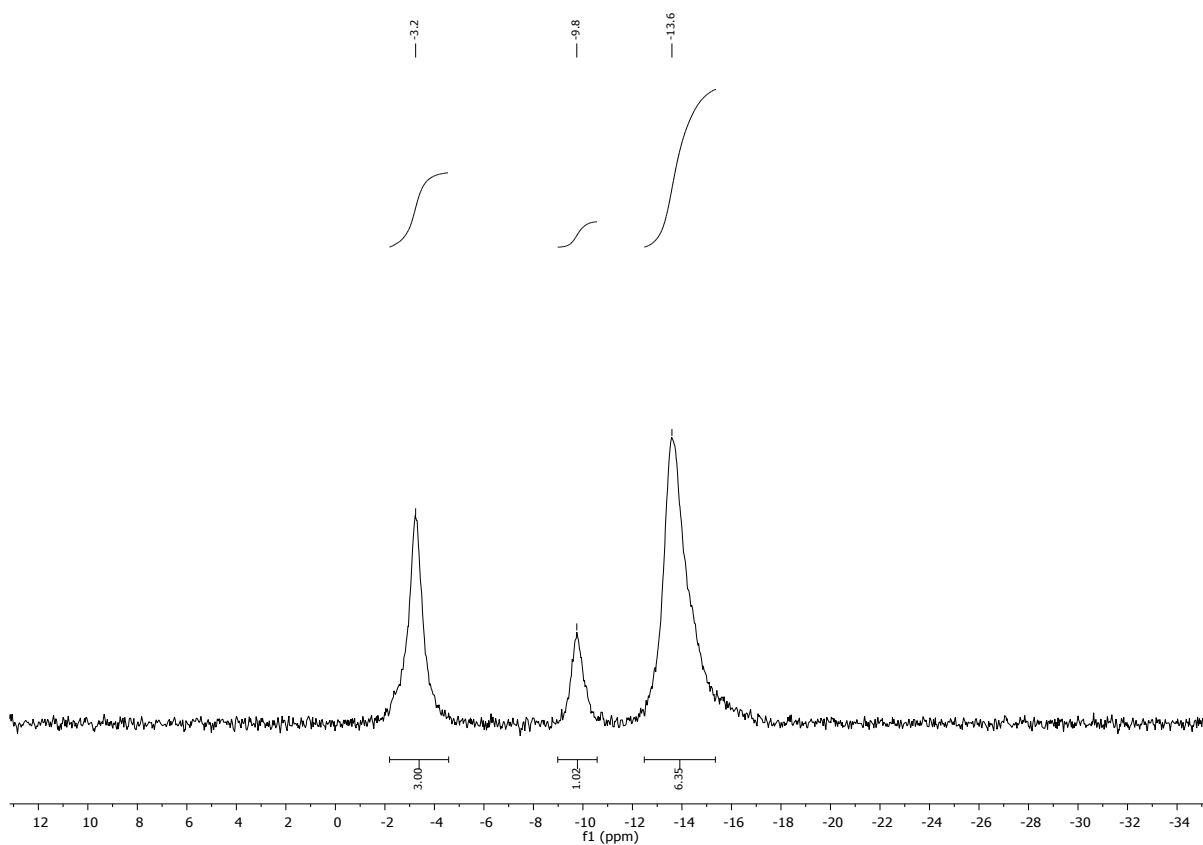

Fig. S2.  $^{11}\text{B}\{^1\text{H}\}$  NMR spectrum of 3-(4'-Me<sub>2</sub>N-C<sub>6</sub>H<sub>4</sub>N=N)-1,2-C<sub>2</sub>B<sub>10</sub>H<sub>11</sub> (**1**).

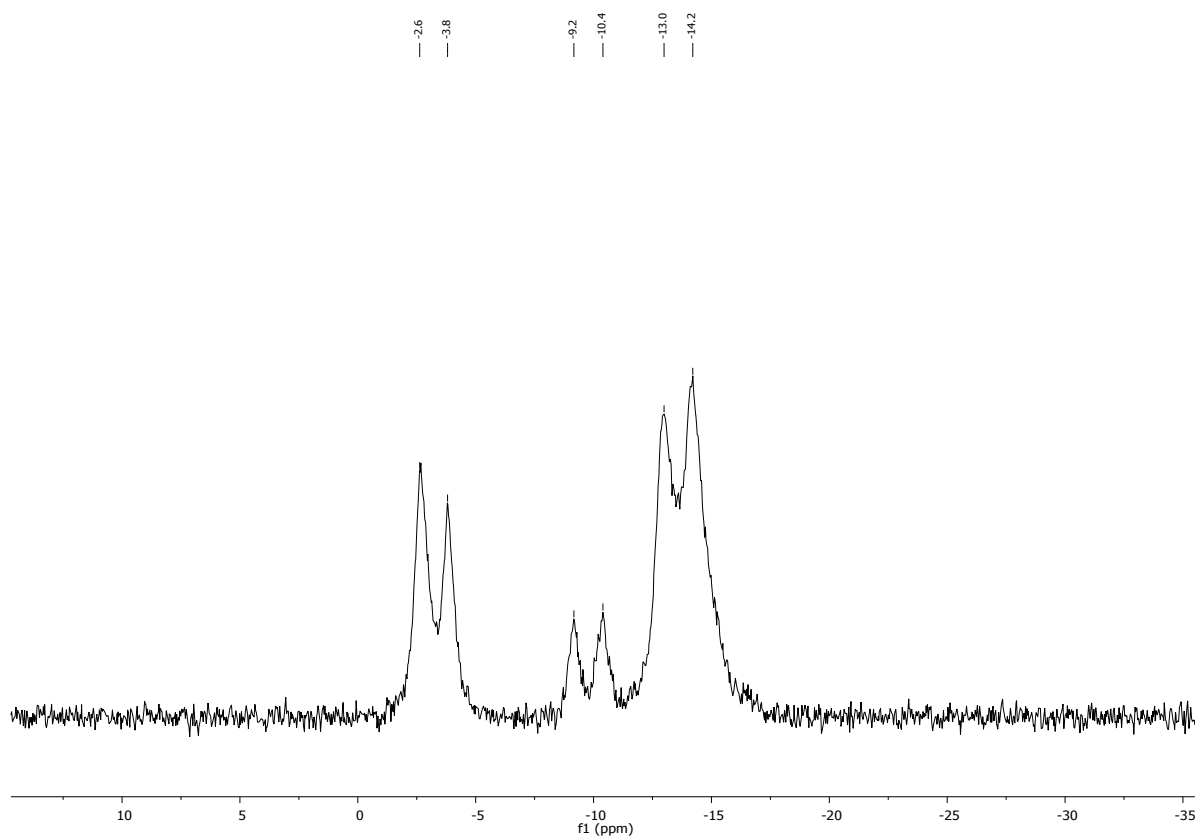

Fig. S3.  $^{11}\text{B}$  NMR spectrum of 3-(4'-Me<sub>2</sub>N-C<sub>6</sub>H<sub>4</sub>N=N)-1,2-C<sub>2</sub>B<sub>10</sub>H<sub>11</sub> (**1**).

**Compound 1a (3-bromo-1,2-dicarbha-*closo*-dodecarborane 3-Br-1,2-C<sub>2</sub>B<sub>10</sub>H<sub>11</sub>).**

The spectral data correspond to those described in the literature [5,6]. <sup>1</sup>H NMR (CDCl<sub>3</sub>, ppm): 3.85 (2H, br.s, CH<sub>carb</sub>). <sup>11</sup>B NMR (CDCl<sub>3</sub>, ppm): -2.1 (2B, d, *J* = 154 Hz), -8.3 (1B, d, *J* = 153 Hz), -11.9 (2B, d, *J* = 175 Hz), -12.4 (1B, s), -13.4 (4B, d, *J* = 180 Hz).

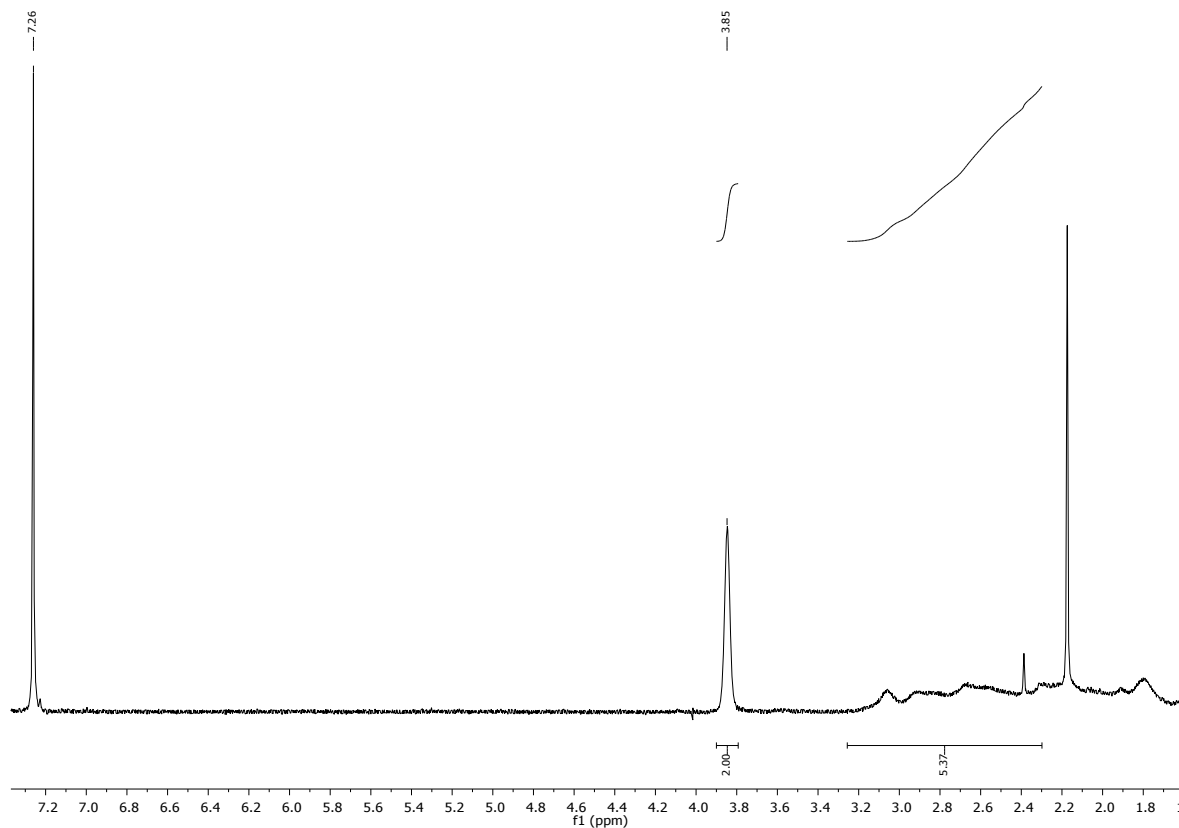

Fig. S4. <sup>1</sup>H NMR spectrum of 3-Br-1,2-C<sub>2</sub>B<sub>10</sub>H<sub>11</sub> (**1a**).

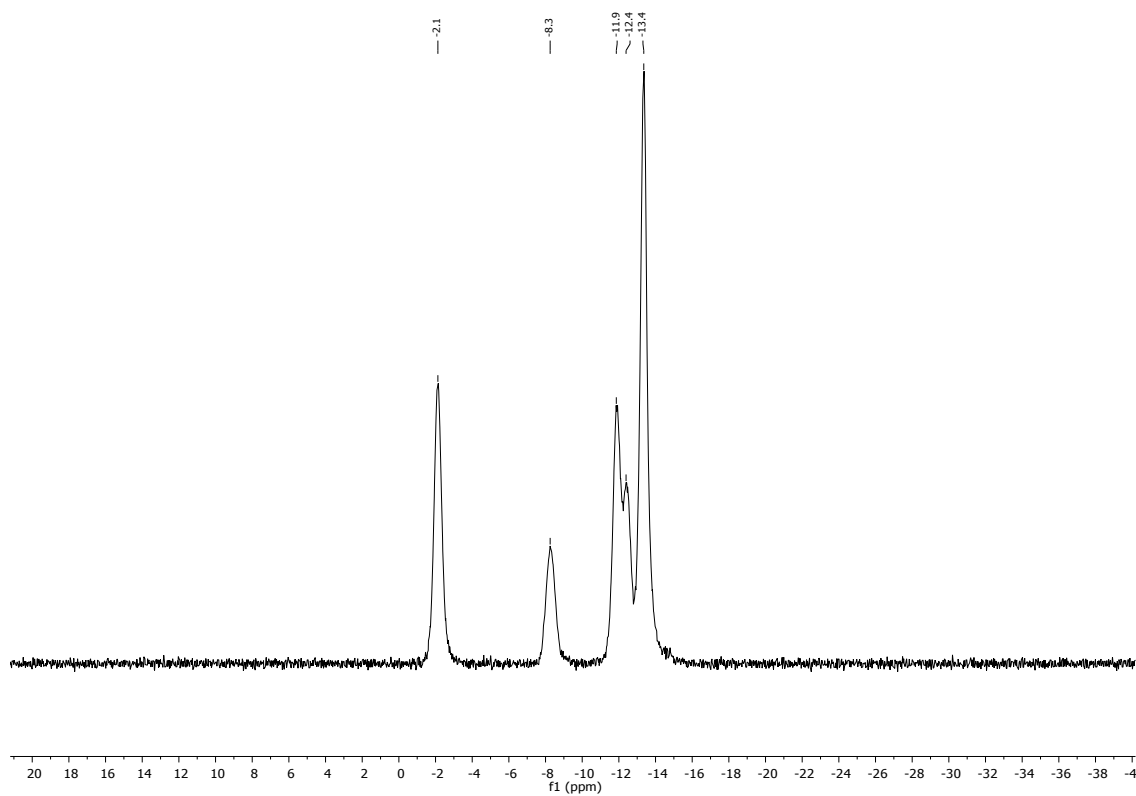

Fig. S5.  $^{11}\text{B}\{^1\text{H}\}$  NMR spectrum of 3-Br-1,2- $\text{C}_2\text{B}_{10}\text{H}_{11}$  (**1a**).

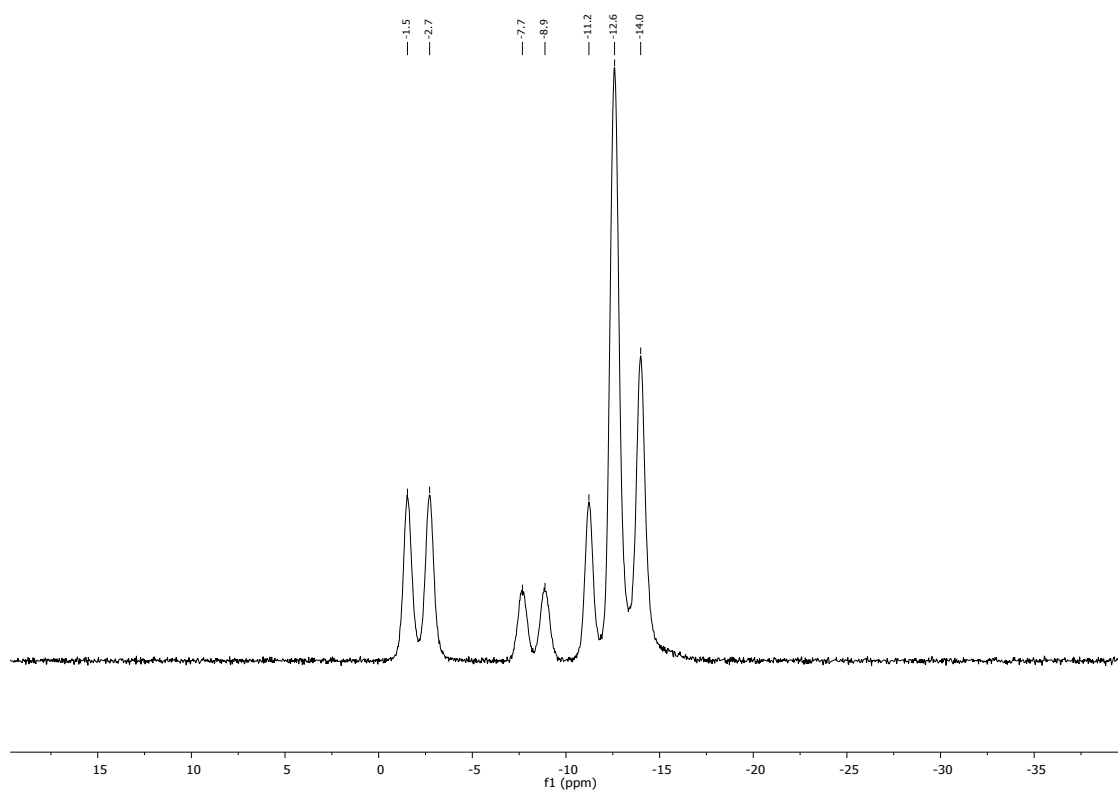

Fig. S6.  $^{11}\text{B}$  NMR spectrum of 3-Br-1,2- $\text{C}_2\text{B}_{10}\text{H}_{11}$  (**1a**).

**Compound 1b (3-(4'-bromobutoxy)-1,2-dicarba-closo-dodecarborane 3-Br(CH<sub>2</sub>)<sub>4</sub>O-1,2-C<sub>2</sub>B<sub>10</sub>H<sub>11</sub>).** <sup>1</sup>H NMR (CDCl<sub>3</sub>, ppm): 3.93 (2H, t, *J* = 6.1 Hz, OCH<sub>2</sub>), 3.57 (2H, br.s, C<sub>H</sub><sub>carb</sub>), 3.45 (2H, t, CH<sub>2</sub> *J* = 6.7 Hz, CH<sub>2</sub>Br), 1.96 (2H, m, CH<sub>2</sub>CHBr), 1.79 (2H, m, OCH<sub>2</sub>CH<sub>2</sub>). <sup>11</sup>B NMR (CDCl<sub>3</sub>, ppm): 1.0 (1B, s), -5.3 (2B, d, *J* = 146 Hz), -12.9 (1B, d, *J* = 147 Hz), -14.7 (3B, d, *J* = 158 Hz), -15.8 (2B, d, *J* = 160 Hz), -19.7 (1B, d, *J* = 144 Hz). <sup>13</sup>C{<sup>1</sup>H} NMR (CDCl<sub>3</sub>, ppm): 69.1 (OCH<sub>2</sub>), 55.8 (C<sub>carb</sub>), 33.4 (CH<sub>2</sub>Br), 29.6 (OCH<sub>2</sub>CH<sub>2</sub>), 29.2 (CH<sub>2</sub>CH<sub>2</sub>Br).

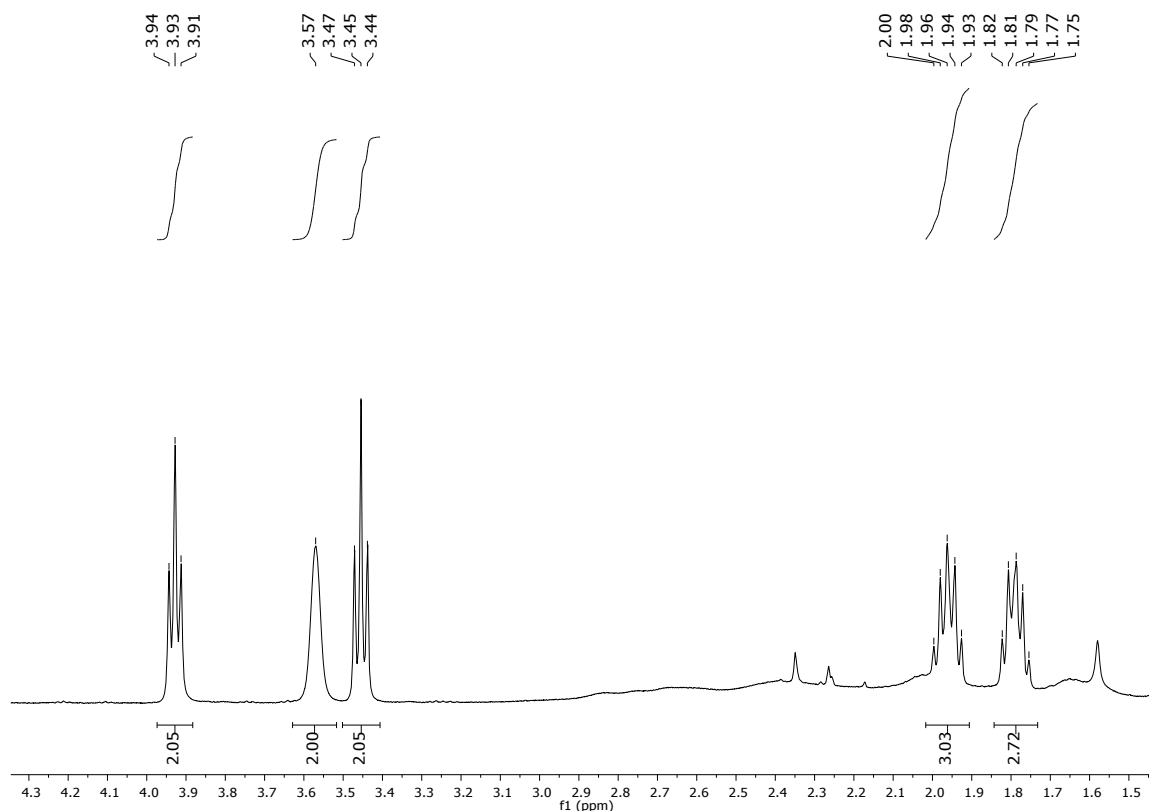

Fig. 7S. <sup>1</sup>H NMR spectrum of 3-Br(CH<sub>2</sub>)<sub>4</sub>O-1,2-C<sub>2</sub>B<sub>10</sub>H<sub>11</sub> (**1b**).

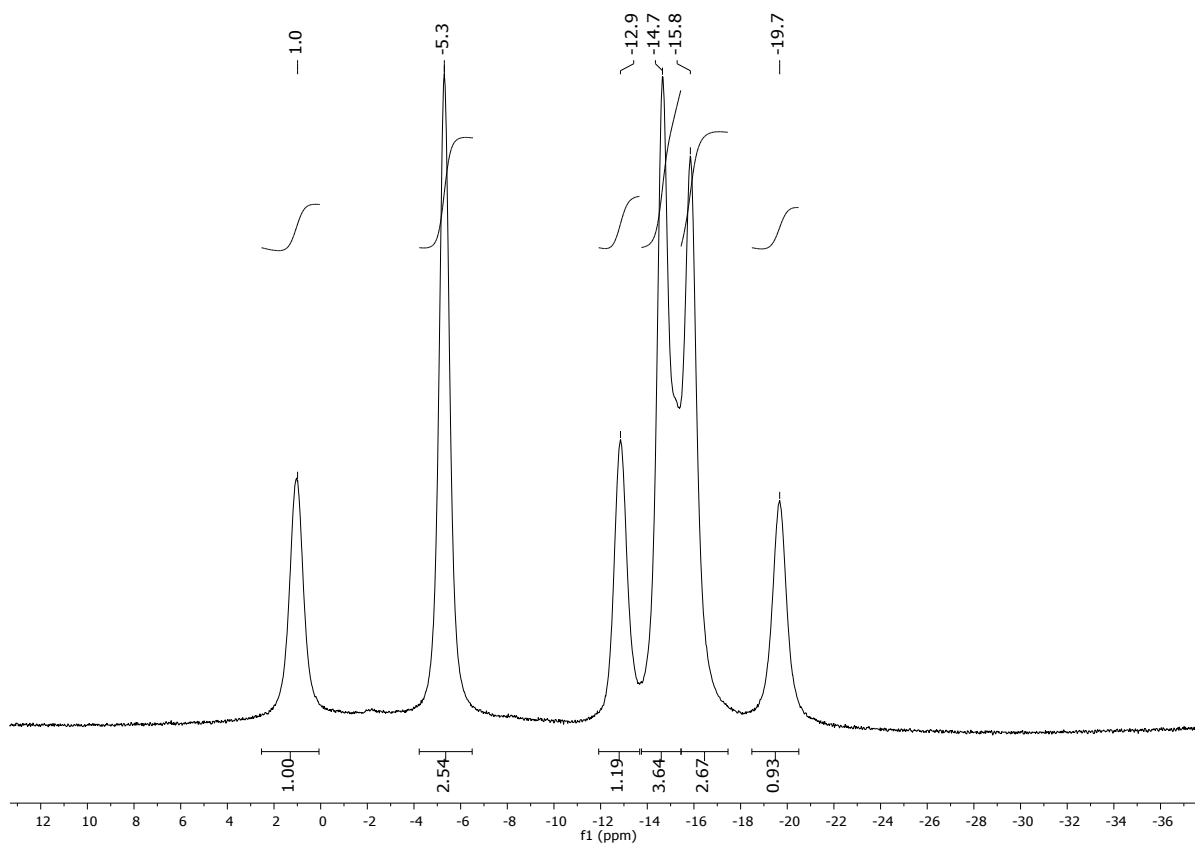

Fig. 8S.  $^{11}\text{B}\{^1\text{H}\}$  NMR spectrum of 3-Br(CH<sub>2</sub>)<sub>4</sub>O-1,2-C<sub>2</sub>B<sub>10</sub>H<sub>11</sub> (**1b**).

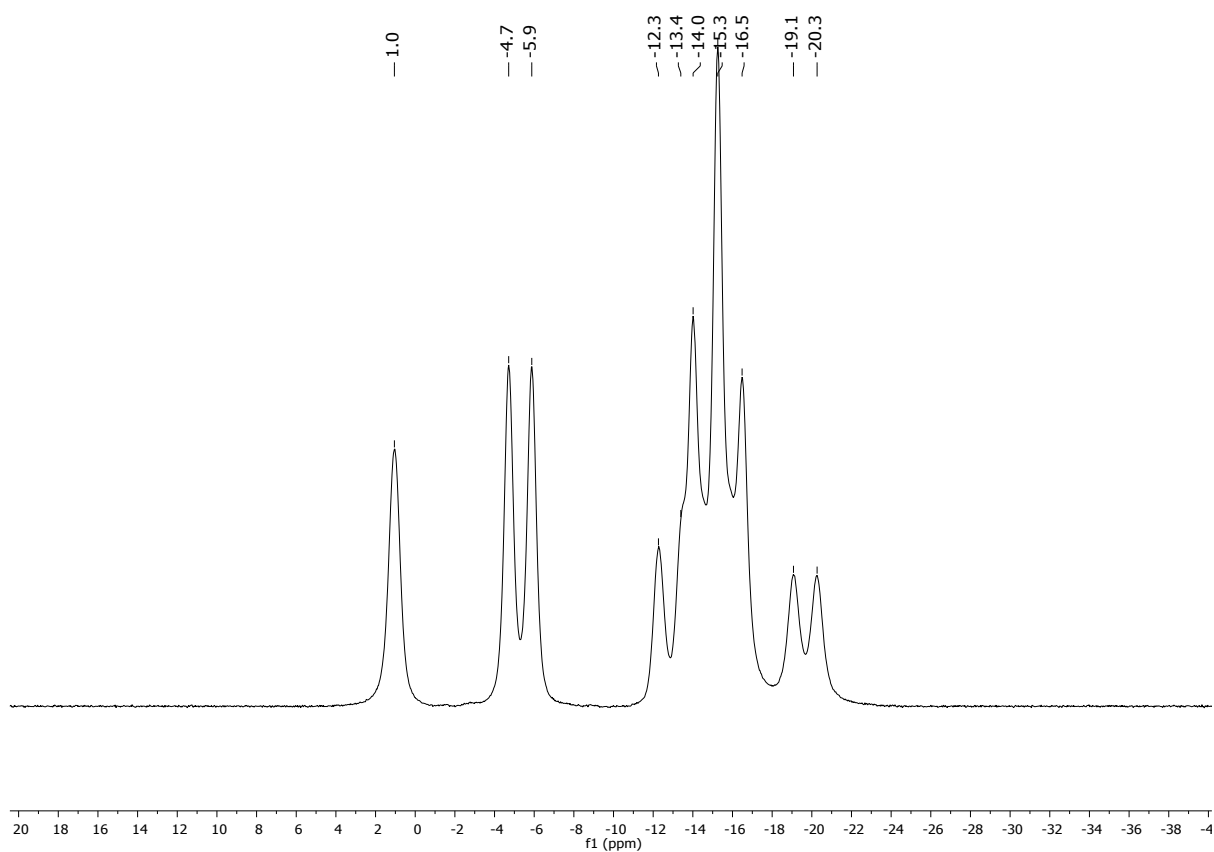

Fig. 9S.  $^{11}\text{B}$  NMR spectrum of 3-Br(CH<sub>2</sub>)<sub>4</sub>O-1,2-C<sub>2</sub>B<sub>10</sub>H<sub>11</sub> (**1b**).





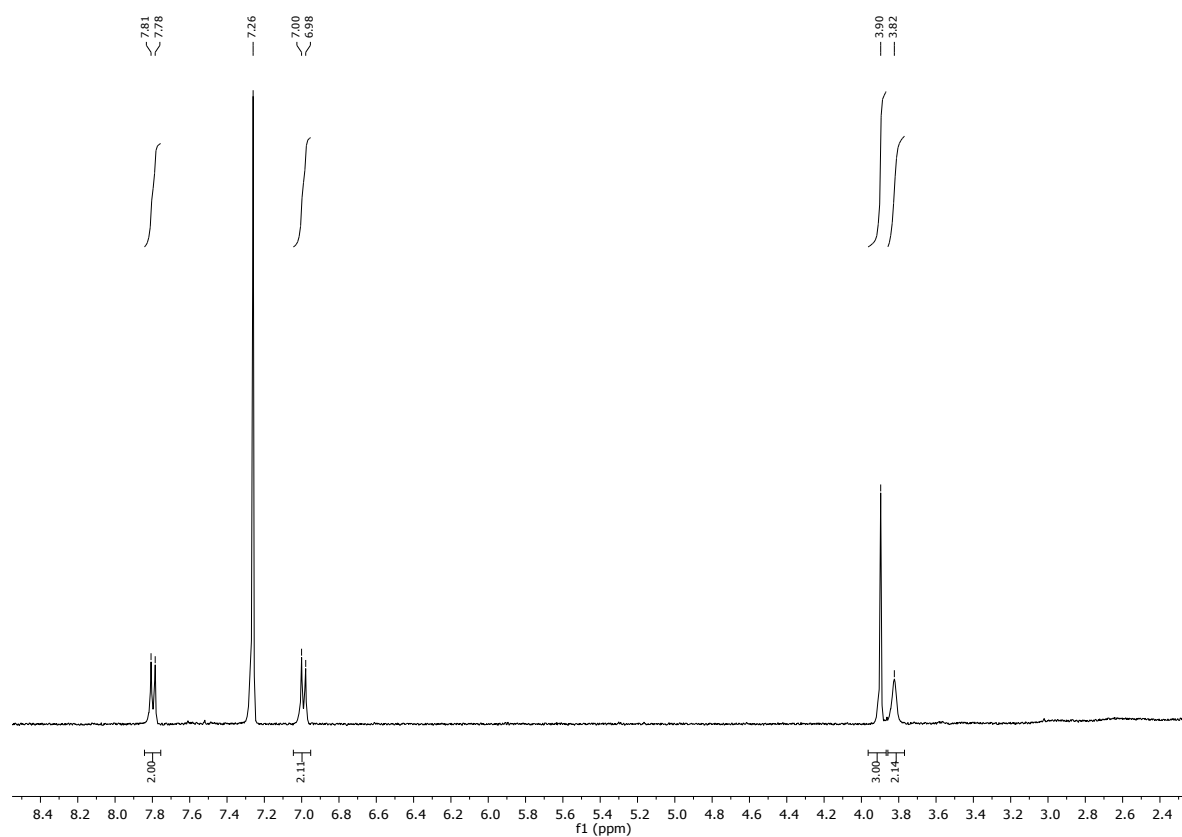

Fig. 11S.  $^1\text{H}$  NMR spectrum of 3-(4'-MeO-C<sub>6</sub>H<sub>4</sub>N=N)-1,2-C<sub>2</sub>B<sub>10</sub>H<sub>11</sub> (**2**).

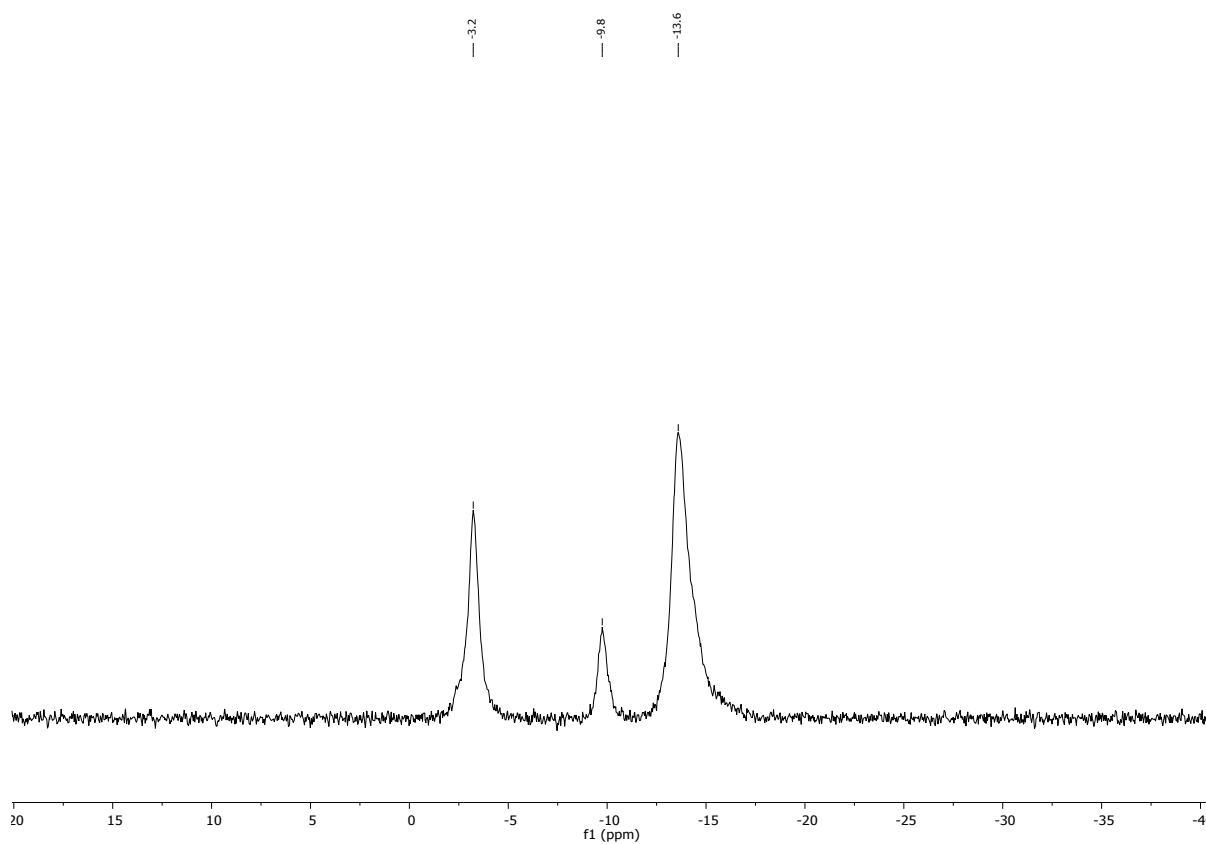

Fig. 12S.  $^{11}\text{B}\{^1\text{H}\}$  NMR spectrum of 3-(4'-MeO-C<sub>6</sub>H<sub>4</sub>N=N)-1,2-C<sub>2</sub>B<sub>10</sub>H<sub>11</sub> (**2**).

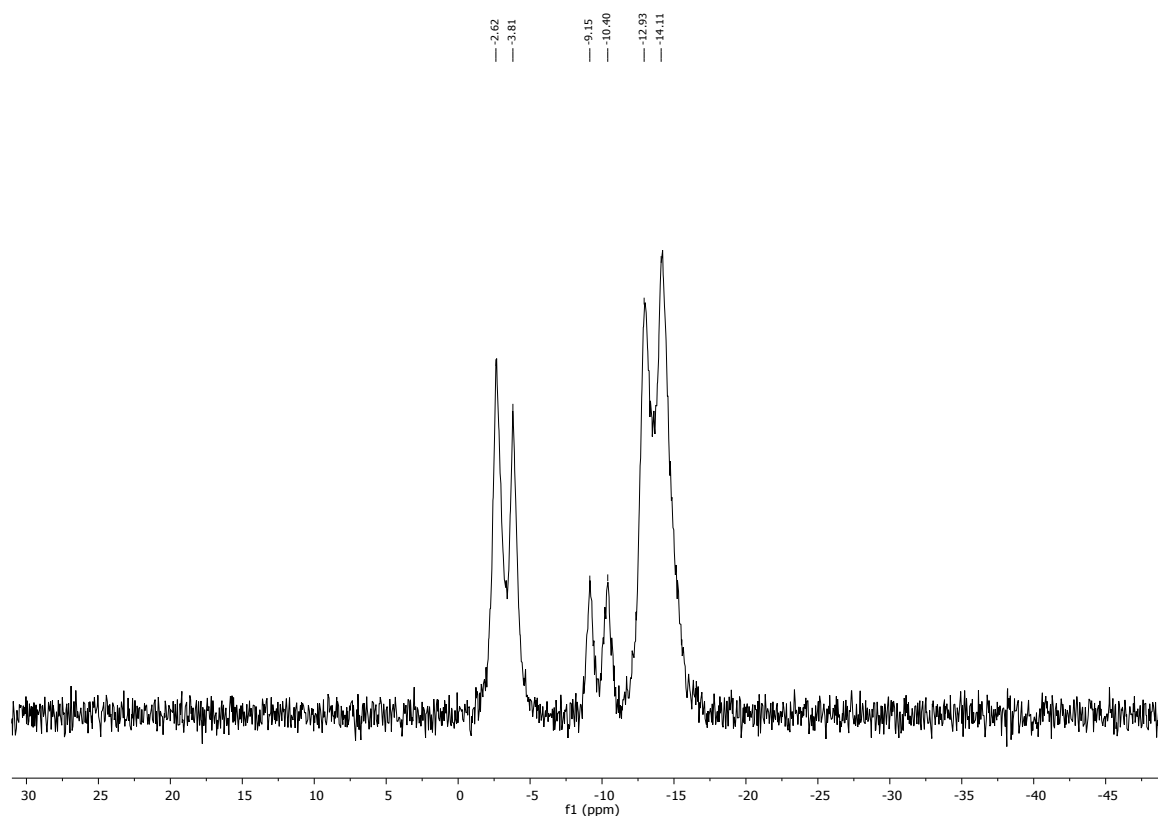

Fig. 13S.  $^{11}\text{B}$  NMR spectrum of 3-(4'-MeO-C<sub>6</sub>H<sub>4</sub>N=N)-1,2-C<sub>2</sub>B<sub>10</sub>H<sub>11</sub> (**2**).

**3-(2'-methylphenyldiazo)-1,2-dicarb-*clos*-dodecarborane 3-(2'-Me-C<sub>6</sub>H<sub>4</sub>N=N)-1,2-C<sub>2</sub>B<sub>10</sub>H<sub>11</sub> (**3**).**

130 mg (0.5 mmol) [3-N<sub>2</sub>-o-C<sub>2</sub>B<sub>10</sub>H<sub>11</sub>][BF<sub>4</sub>] was placed in a 25 mL two-neck flask under argon atmosphere, cooled to -30 °C and diethyl ether (5 mL) was added. Then a 2.0 M solution of *o*-MeC<sub>6</sub>H<sub>4</sub>MgBr in Et<sub>2</sub>O (0.75 mL, 1.5 mmol) was added dropwise to the resulting suspension. The reaction mixture first darkened and then turned red, cooling was removed, and the mixture was stirred for 12 h. Then water (20 mL) was added, the product was extracted with diethyl ether (3×20 mL). The organic fractions were separated, combined, dried over Na<sub>2</sub>SO<sub>4</sub>, filtered, and concentrated on a rotary evaporator. The resulting residue was washed with hot hexane (3×10 mL), the filtrate was evaporated and subjected to column chromatography (eluent diethyl ether—hexane, 1 : 1 (v/v)). The boron-containing fraction was collected and concentrated on a rotary evaporator to obtain a pink compound **1** (61 mg, 47%).  $^1\text{H}$  NMR (CDCl<sub>3</sub>, ppm): 7.42 (1H, t,  $J = 4.2$  Hz, C<sub>6</sub>H<sub>4</sub>), 7.36 (1H, d,  $J = 4.2$  Hz, C<sub>6</sub>H<sub>4</sub>), 7.23 (2H, m, C<sub>6</sub>H<sub>4</sub>), 3.80 (2H, br.s, CH<sub>carb</sub>), 2.76 (3H, s, CH<sub>3</sub>).  $^{11}\text{B}$  NMR (CDCl<sub>3</sub>, ppm): -2.4 (1B, s), -3.1 (2B, d,  $J = 140$  Hz), -9.6 (1B, d,  $J = 160$  Hz), -13.6 (6B, d,  $J = 163$  Hz). IR (CHCl<sub>3</sub>, cm<sup>-1</sup>): 3068 (C<sub>carb</sub>-H), 3020 (C<sub>aryl</sub>-H), 2957-2853 (C<sub>Me</sub>-H), 2600, 2583 (B-H), 1600 ((C-C)<sub>aryl</sub>). UV (CHCl<sub>3</sub>, nm): 525.

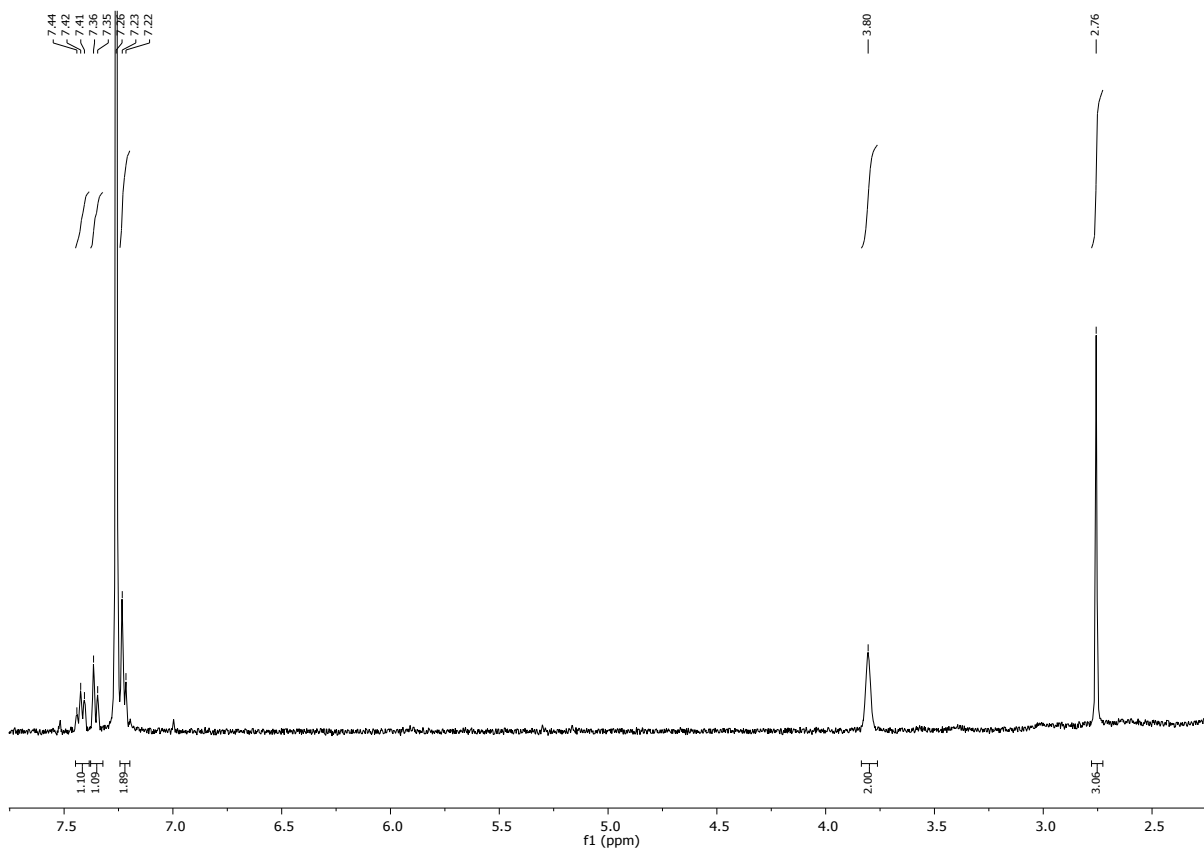

Fig. 14S.  $^1\text{H}$  NMR spectrum of 3-(2'-Me-C<sub>6</sub>H<sub>4</sub>N=N)-1,2-C<sub>2</sub>B<sub>10</sub>H<sub>11</sub> (**3**).

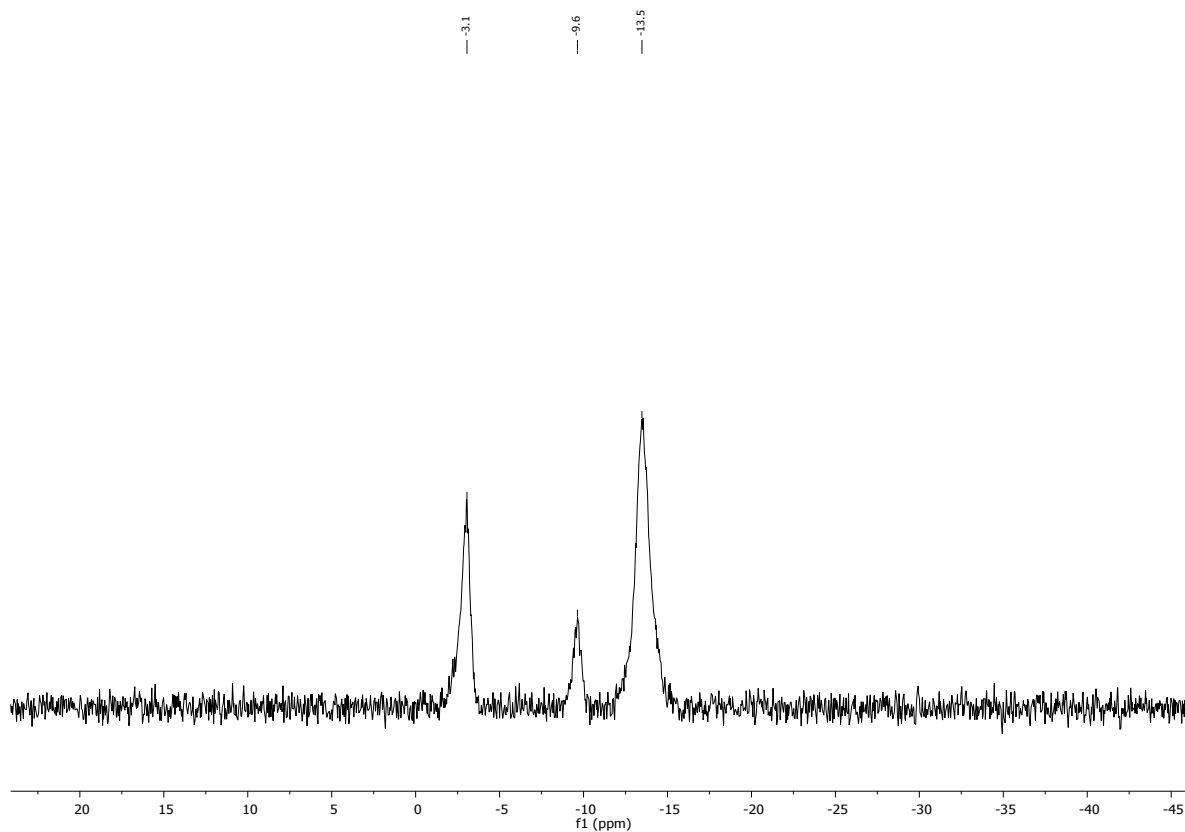

Fig. 15S.  $^{11}\text{B}\{^1\text{H}\}$  NMR spectrum of 3-(2'-Me-C<sub>6</sub>H<sub>4</sub>N=N)-1,2-C<sub>2</sub>B<sub>10</sub>H<sub>11</sub> (**3**).

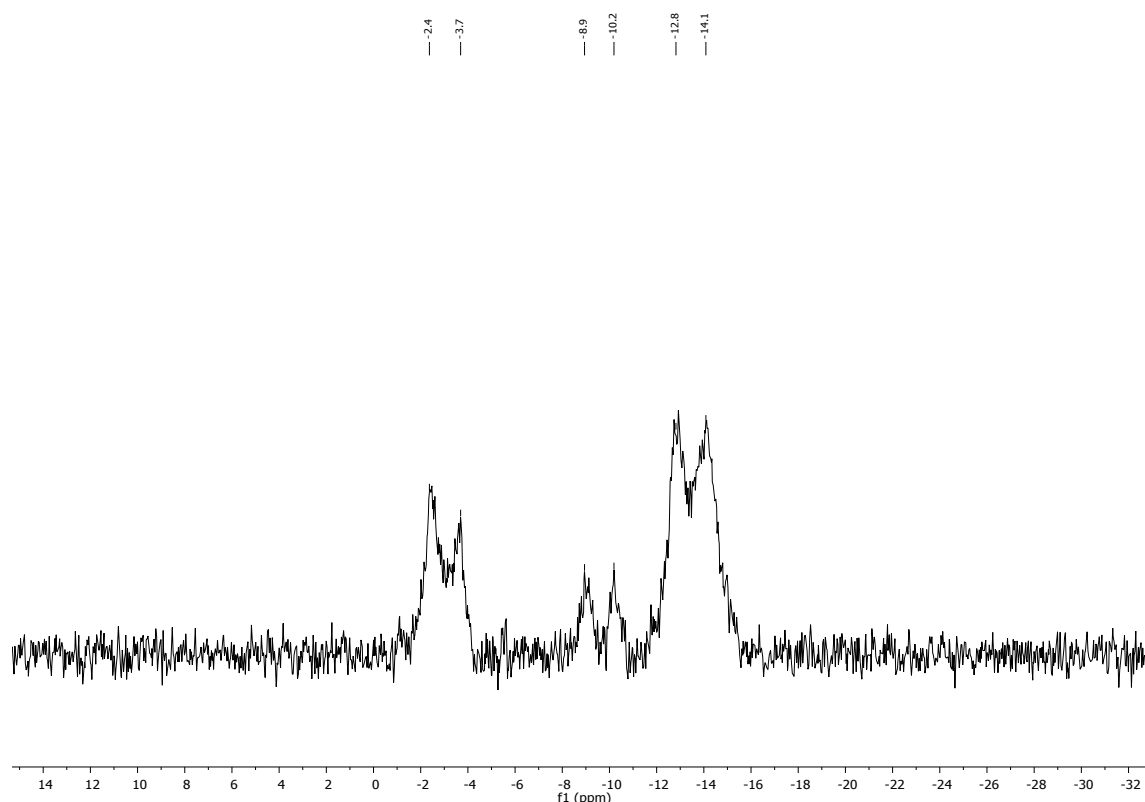

Fig. 16S.  $^{11}\text{B}$  NMR spectrum of 3-(2'-Me-C<sub>6</sub>H<sub>4</sub>N=N)-1,2-C<sub>2</sub>B<sub>10</sub>H<sub>11</sub> (**3**).

**Cesium 3-(4'-N,N-dimethylaminophenyldiazo)-7,8-dicarba-*nido*-undecaborate Cs[3-(4'-Me<sub>2</sub>NC<sub>6</sub>H<sub>4</sub>N=N)-7,8-C<sub>2</sub>B<sub>9</sub>H<sub>11</sub>] (**4**).**

Cesium fluoride (136 mg, 0.88 mmol) was added to a solution of compound **1** (65 mg, 0.22 mmol) in ethanol (10 mL) and the reaction mixture was heated under reflux for 16 h. Then, the reaction mixture was cooled to room temperature and evaporated on a rotary evaporator, the residue was dissolved in acetone (20 mL), the precipitate was filtered off, and the filtrate was evaporated again to obtain a pink compound **4** (90 mg, 99%).  $^1\text{H}$  NMR (acetone-*d*<sub>6</sub>, ppm): 7.57 (2H, d,  $J = 8.9$  Hz, C<sub>6</sub>H<sub>4</sub>), 6.72 (2H, d,  $J = 8.9$  Hz, C<sub>6</sub>H<sub>4</sub>), 3.00 (6H, s, N(CH<sub>3</sub>)<sub>2</sub>), 2.04 (2H, br.s, CH<sub>carb</sub>), -2.51 (1H, br.s, BHB).  $^{11}\text{B}$  NMR (acetone-*d*<sub>6</sub>, ppm): -4.8 (1B, s), -11.1 (2B, d,  $J = 137$  Hz), -16.8 (2B, d,  $J = 136$  Hz), -22.6 (2B, d,  $J = 149$  Hz), -36.0 (1B, d,  $J = 159$  Hz), -37.5 (1B, d,  $J = 146$  Hz).  $^{13}\text{C}\{^1\text{H}\}$  NMR (acetone-*d*<sub>6</sub>, ppm): 151.9 (N<sub>2</sub>C<sub>Ar</sub>), 147.4 (C<sub>Ar</sub>NMe<sub>2</sub>), 122.8 (C<sub>Ar</sub>H), 111.1 (C<sub>Ar</sub>H), 45.6 (C<sub>carb</sub>), 39.6 (N(CH<sub>3</sub>)<sub>2</sub>). IR (acetone, cm<sup>-1</sup>): 3071 (C<sub>carb</sub>-H), 3036 (C<sub>aryl</sub>-H), 2924-2810 (C<sub>Me</sub>-H), 2549, 2530, 2499 (B-H), 1697, 1684 ((C=C)<sub>aryl</sub>). UV (acetone, nm): 470. HRMS (ESI), found  $m/z$  281.2581 [M]<sup>-</sup>; C<sub>10</sub>H<sub>21</sub>B<sub>9</sub>N<sub>3</sub>; calculated for C<sub>10</sub>H<sub>21</sub>B<sub>9</sub>N<sub>3</sub>: [M]<sup>-</sup> = 281.2622.

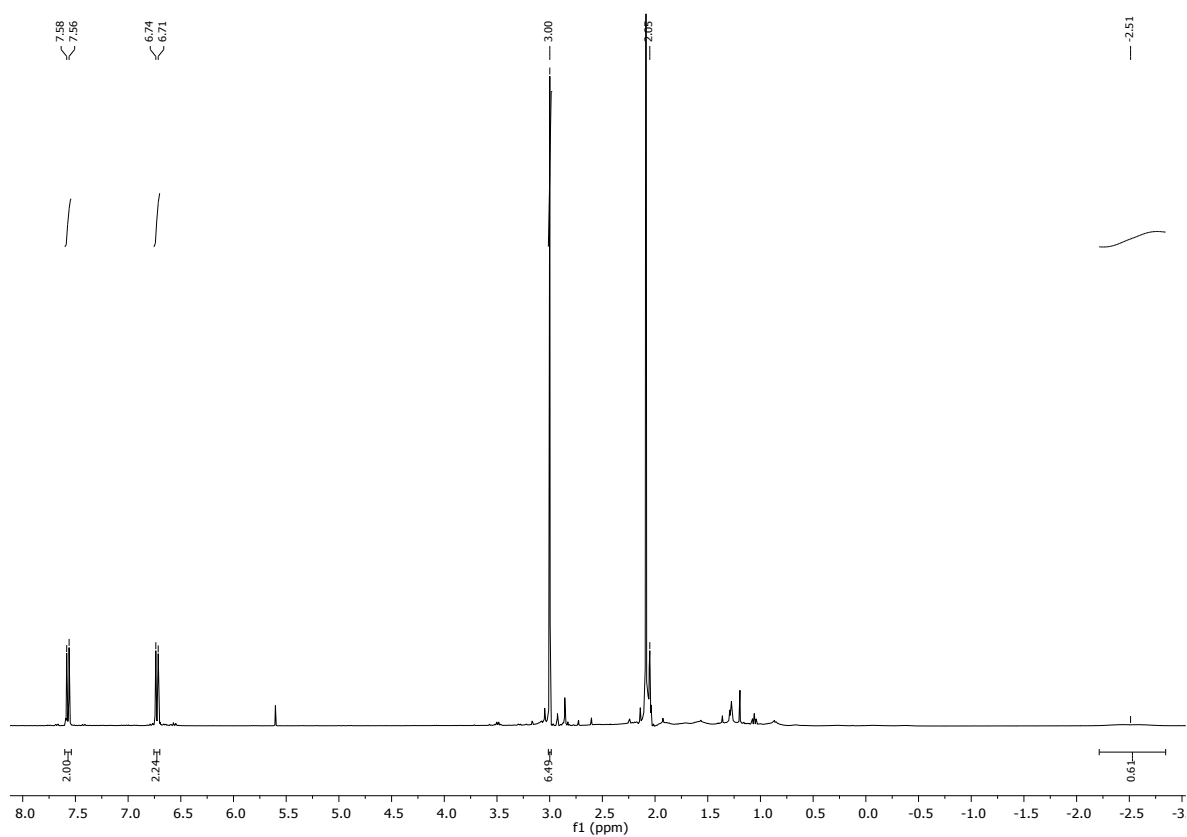

Fig. 17S.  $^1\text{H}$  NMR spectrum of  $\text{Cs}[3-(4'\text{-Me}_2\text{NC}_6\text{H}_4\text{N}=\text{N})\text{-}7,8\text{-C}_2\text{B}_9\text{H}_{11}]$  (**4**).

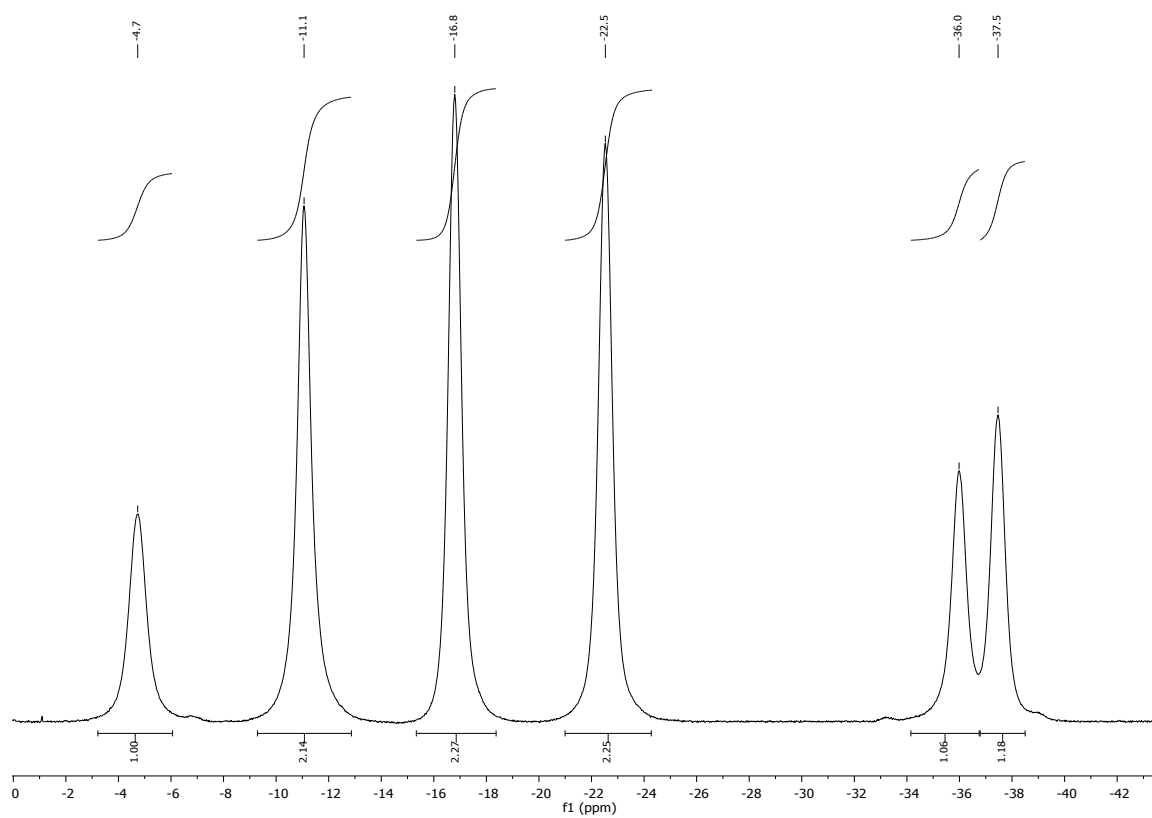

Fig. 18S.  $^{11}\text{B}\{^1\text{H}\}$  NMR spectrum of  $\text{Cs}[3-(4'\text{-Me}_2\text{NC}_6\text{H}_4\text{N}=\text{N})\text{-}7,8\text{-C}_2\text{B}_9\text{H}_{11}]$  (**4**).

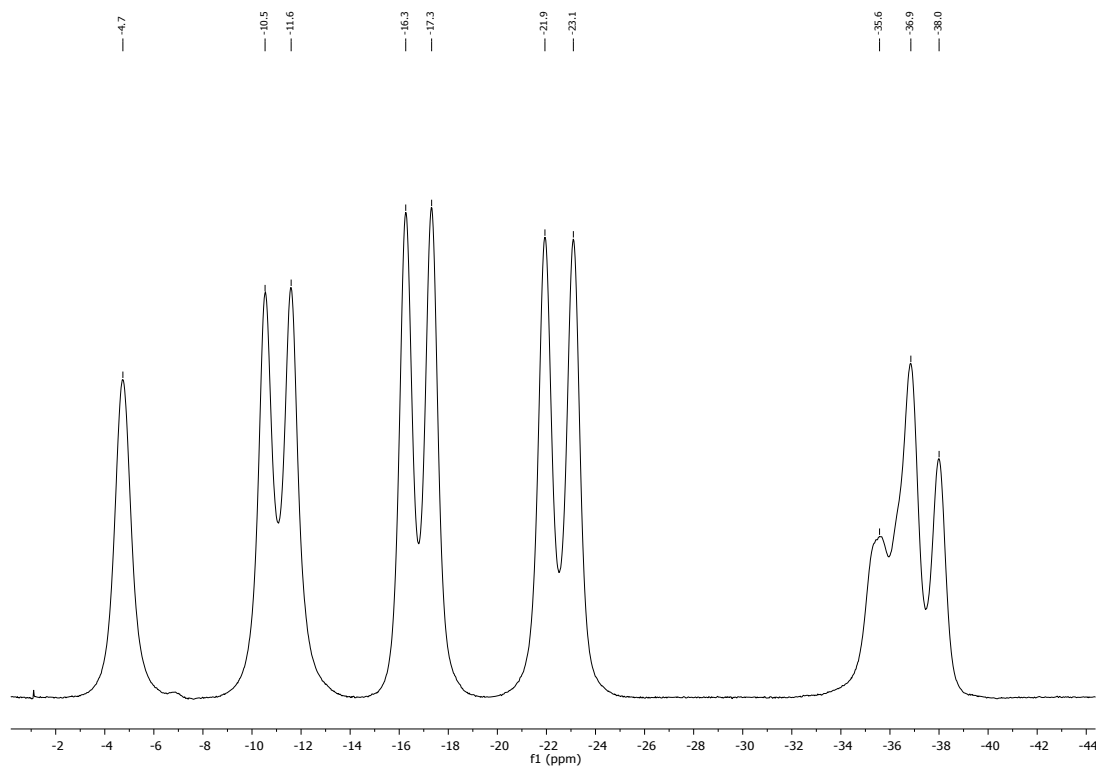

Fig. 19S.  $^{11}\text{B}$  NMR spectrum of  $\text{Cs}[3-(4'\text{-Me}_2\text{NC}_6\text{H}_4\text{N}=\text{N})\text{-}7,8\text{-C}_2\text{B}_9\text{H}_{11}]$  (**4**).

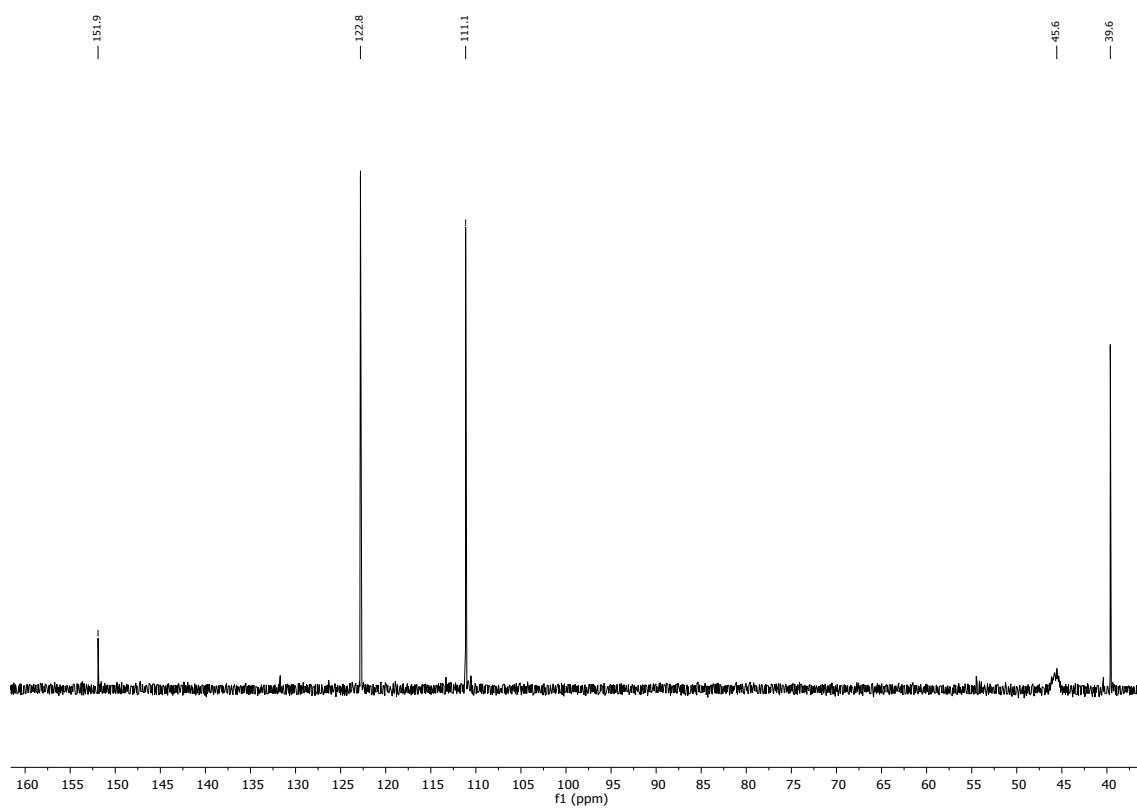

Fig. 20S.  $^{13}\text{C}\{^1\text{H}\}$  NMR spectrum of  $\text{Cs}[3-(4'\text{-Me}_2\text{NC}_6\text{H}_4\text{N}=\text{N})\text{-}7,8\text{-C}_2\text{B}_9\text{H}_{11}]$  (**4**).

**Cesium 3-(4'-methoxyphenyldiazo)-7,8-dicarba-*nido*-undecaborate Cs[3-(4'-MeO-C<sub>6</sub>H<sub>4</sub>N=N)-7,8-C<sub>2</sub>B<sub>9</sub>H<sub>11</sub>] (5)**

The synthesis was carried out similarly to the procedure described above using compound **2** (40 mg, 0.16 mmol) and CsF (97 mg, 0.64 mmol). The yield of red compound **5** was 64 mg (99%). <sup>1</sup>H NMR (acetone-*d*<sub>6</sub>, ppm): 7.63 (2H, d, *J* = 8.9 Hz, C<sub>6</sub>H<sub>4</sub>), 6.98 (2H, d, *J* = 8.9 Hz, C<sub>6</sub>H<sub>4</sub>), 3.84 (3H, s, CH<sub>3</sub>O), 2.87 (2H, br.s, CH<sub>carb</sub>), -2.52 (1H, br.s, BHB). <sup>11</sup>B NMR (acetone-*d*<sub>6</sub>, ppm): -4.9 (1B, s), -11.0 (2B, d, *J* = 137 Hz), -16.7 (2B, d, *J* = 136 Hz), -22.6 (2B, d, *J* = 151 Hz), -36.8 (1B, d, *J* = 125 Hz), -37.5 (1B, d, *J* = 155 Hz). <sup>13</sup>C{<sup>1</sup>H} NMR (acetone-*d*<sub>6</sub>, ppm): 161.2 (MeOC<sub>Ar</sub>), 150.1 (C<sub>Ar</sub>N<sub>2</sub>), 122.7 (C<sub>Ar</sub>H), 113.5 (C<sub>Ar</sub>H), 54.9 (OCH<sub>3</sub>), 45.9 (C<sub>carb</sub>). IR (acetone, cm<sup>-1</sup>): 3073 (C<sub>carb</sub>-H), 3005 (C<sub>aryl</sub>-H), 2956-2841 (C<sub>Me</sub>-H), 2528, 2507 (B-H), 1601, 1582 ((C=C)<sub>aryl</sub>), 1252 (H<sub>3</sub>C-O). UV (acetone, nm): 495. HRMS (ESI), found *m/z* 268.2295 [M]<sup>-</sup>; C<sub>9</sub>H<sub>18</sub>B<sub>9</sub>N<sub>2</sub>O; calculated for C<sub>9</sub>H<sub>18</sub>B<sub>9</sub>N<sub>2</sub>O: [M]<sup>-</sup> = 268.2305.

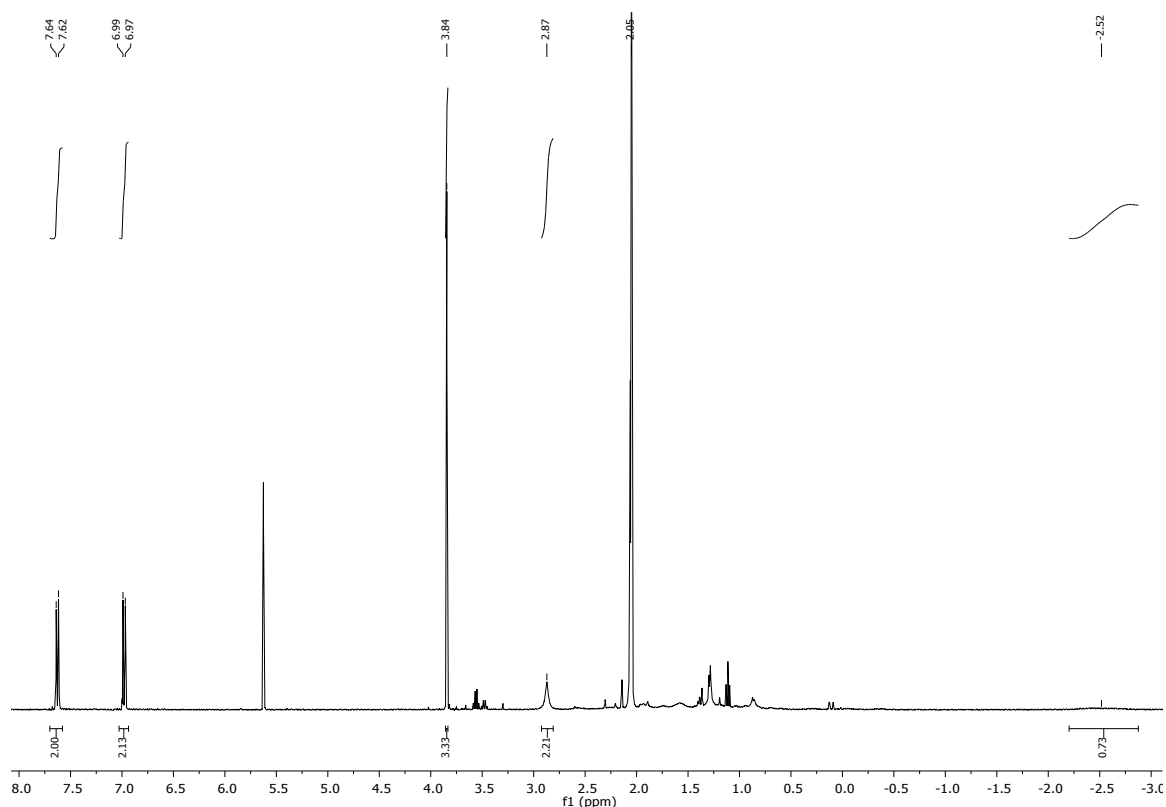

Fig. 21S. <sup>1</sup>H NMR spectrum of Cs[3-(4'-MeOC<sub>6</sub>H<sub>4</sub>N=N)-7,8-C<sub>2</sub>B<sub>9</sub>H<sub>11</sub>] (**5**).

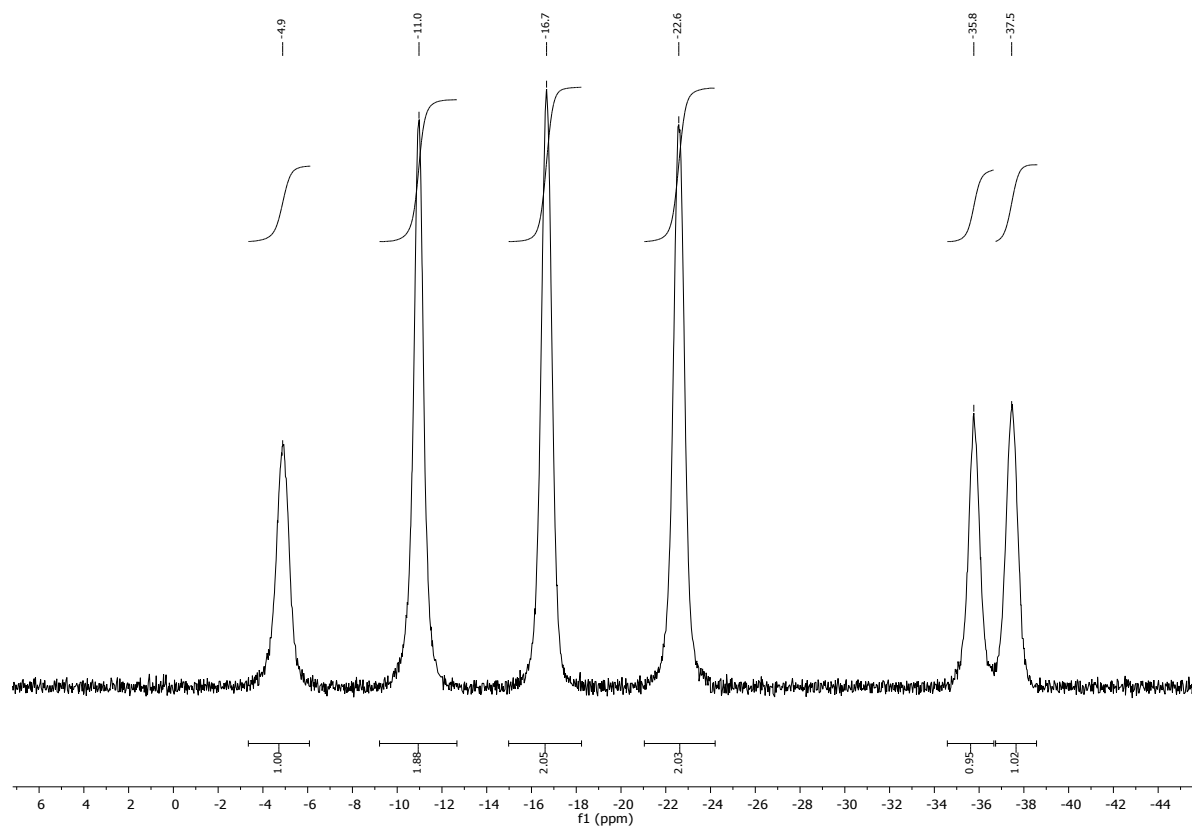

Fig. 22S.  $^{11}\text{B}\{^1\text{H}\}$  NMR spectrum of  $\text{Cs}[3-(4'\text{-MeOC}_6\text{H}_4\text{N}=\text{N})\text{-}7,8\text{-C}_2\text{B}_9\text{H}_{11}]$  (**5**).

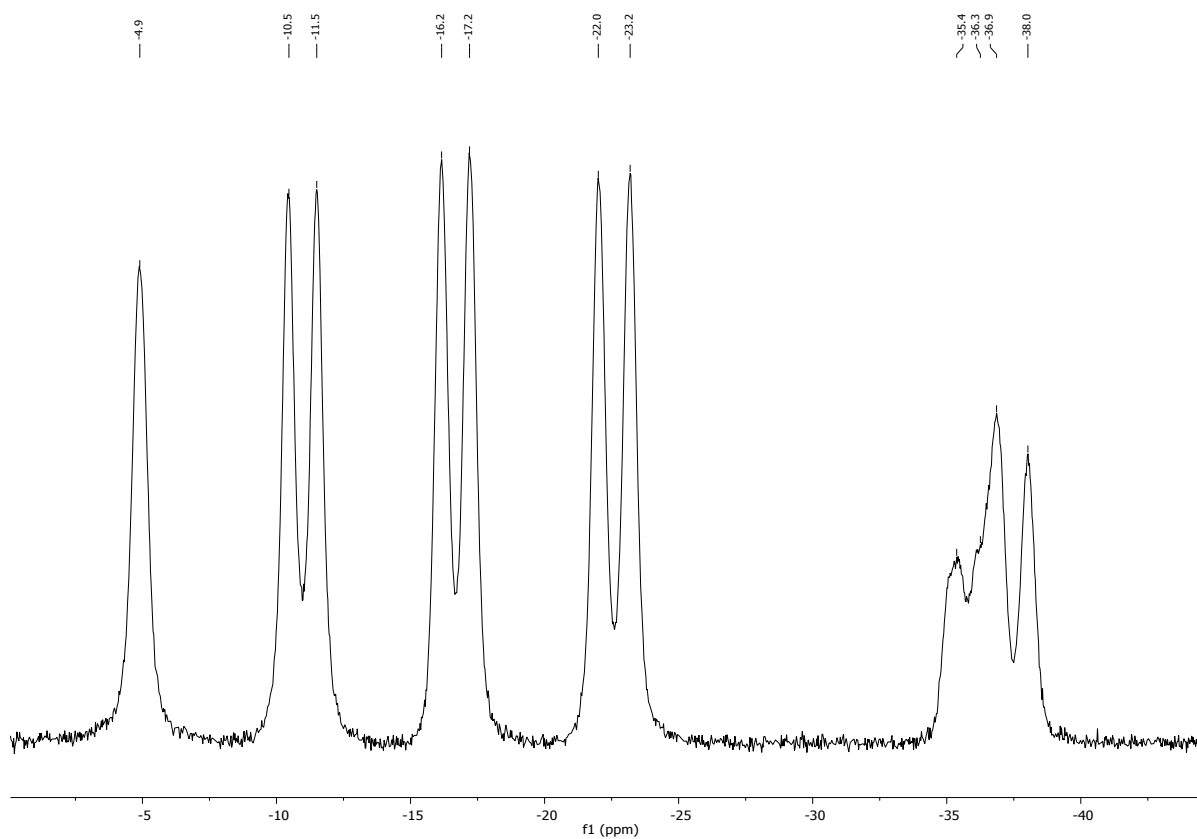

Fig. 23S.  $^{11}\text{B}$  NMR spectrum of  $\text{Cs}[3-(4'\text{-MeOC}_6\text{H}_4\text{N}=\text{N})\text{-}7,8\text{-C}_2\text{B}_9\text{H}_{11}]$  (**5**).



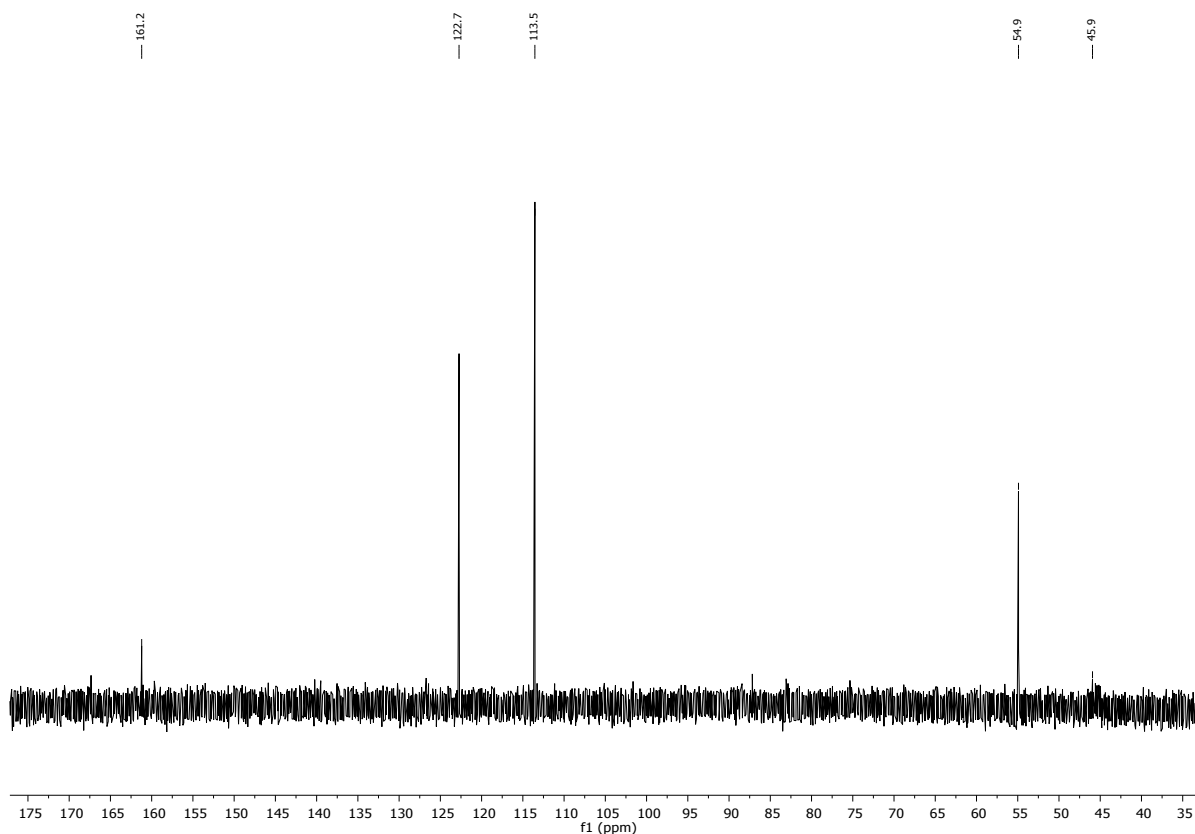

Fig. 24S.  $^{13}\text{C}\{^1\text{H}\}$  NMR spectrum of  $\text{Cs}[3-(4'\text{-MeOC}_6\text{H}_4\text{N}=\text{N})\text{-}7,8\text{-C}_2\text{B}_9\text{H}_{11}]$  (**5**).

**Cesium 3-(2'-methylphenyldiazo)-7,8-dicarba-*nido*-undecaborate**  $\text{Cs}[3-(2'\text{-Me-C}_6\text{H}_4\text{N}=\text{N})\text{-}7,8\text{-C}_2\text{B}_9\text{H}_{11}]$  (**6**).

The synthesis was carried out similarly to the procedure described above using compound **3** (47 mg, 0.18 mmol) and CsF (55 mg, 0.72 mmol). The yield of pink compound **6** was 68 mg (98%).  $^1\text{H}$  NMR (acetone- $d_6$ , ppm): 7.27 (1H, m,  $\text{C}_6\text{H}_4$ ), 7.14 (1H, m,  $\text{C}_6\text{H}_4$ ), 7.02 (2H, d,  $J = 7.8$  Hz,  $\text{C}_6\text{H}_4$ ), 2.91 (2H, br.s,  $\text{CH}_{\text{carb}}$ ), 2.65 (3H, s,  $\text{CH}_3$ ), -2.51 (1H, br.s, BHB).  $^{11}\text{B}$  NMR (acetone- $d_6$ , ppm): -4.9 (1B, s), -10.8 (2B, d,  $J = 137$  Hz), -16.6 (2B, d,  $J = 136$  Hz), -22.6 (2B, d,  $J = 150$  Hz), -35.6 (1B, d,  $J = 131$  Hz), -37.3 (1B, d,  $J = 155$  Hz).  $^{13}\text{C}\{^1\text{H}\}$  NMR (acetone- $d_6$ , ppm): 152.9 ( $\text{C}_{\text{Ar}}\text{N}_2$ ), 136.5 ( $\text{CH}_3\text{C}_{\text{Ar}}$ ), 130.9 ( $\text{C}_{\text{Ar}}\text{H}$ ), 129.7 ( $\text{C}_{\text{Ar}}\text{H}$ ), 125.9 ( $\text{C}_{\text{Ar}}\text{H}$ ), 112.5 ( $\text{C}_{\text{Ar}}\text{H}$ ), 45.7 ( $\text{C}_{\text{carb}}$ ), 16.2 ( $\text{CH}_3$ ). IR (acetone,  $\text{cm}^{-1}$ ): 3056 ( $\text{C}_{\text{carb}}\text{-H}$ ), 3025 ( $\text{C}_{\text{aryl}}\text{-H}$ ), 2973-2855 ( $\text{C}_{\text{Me}}\text{-H}$ ), 2526 (B-H), 1699 ( $(\text{C}=\text{C})_{\text{aryl}}$ ), 1254 ( $\text{H}_3\text{C-O}$ ). UV (acetone, nm): 517. HRMS (ESI), found  $m/z$  252.2359 [ $\text{M}$ ] $^-$ ;  $\text{C}_9\text{H}_{18}\text{B}_9\text{N}_2$ ; calculated for  $\text{C}_9\text{H}_{18}\text{B}_9\text{N}_2$ : [ $\text{M}$ ] $^-$  = 252.2356.

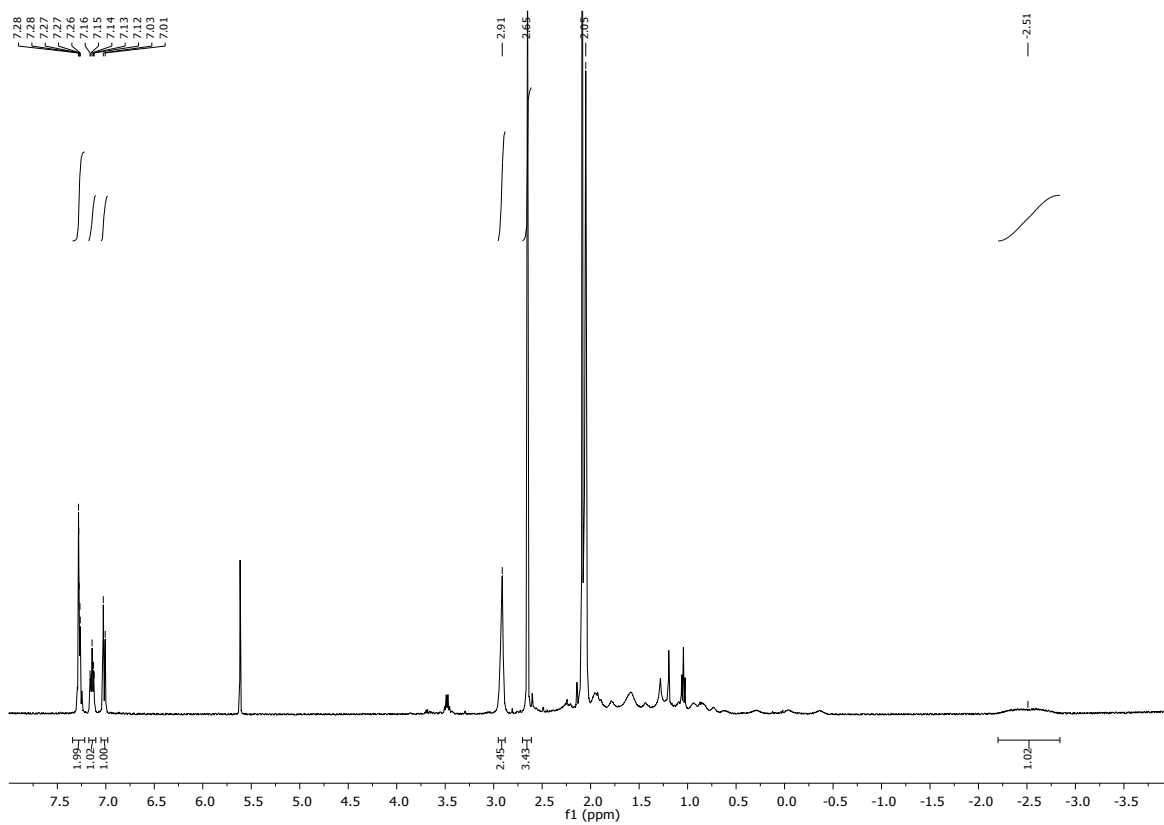

Fig. 25S.  $^1\text{H}$  NMR spectrum of  $\text{Cs}[3-(2'\text{-MeC}_6\text{H}_4\text{N}=\text{N})\text{-}7,8\text{-C}_2\text{B}_9\text{H}_{11}]$  (**6**).

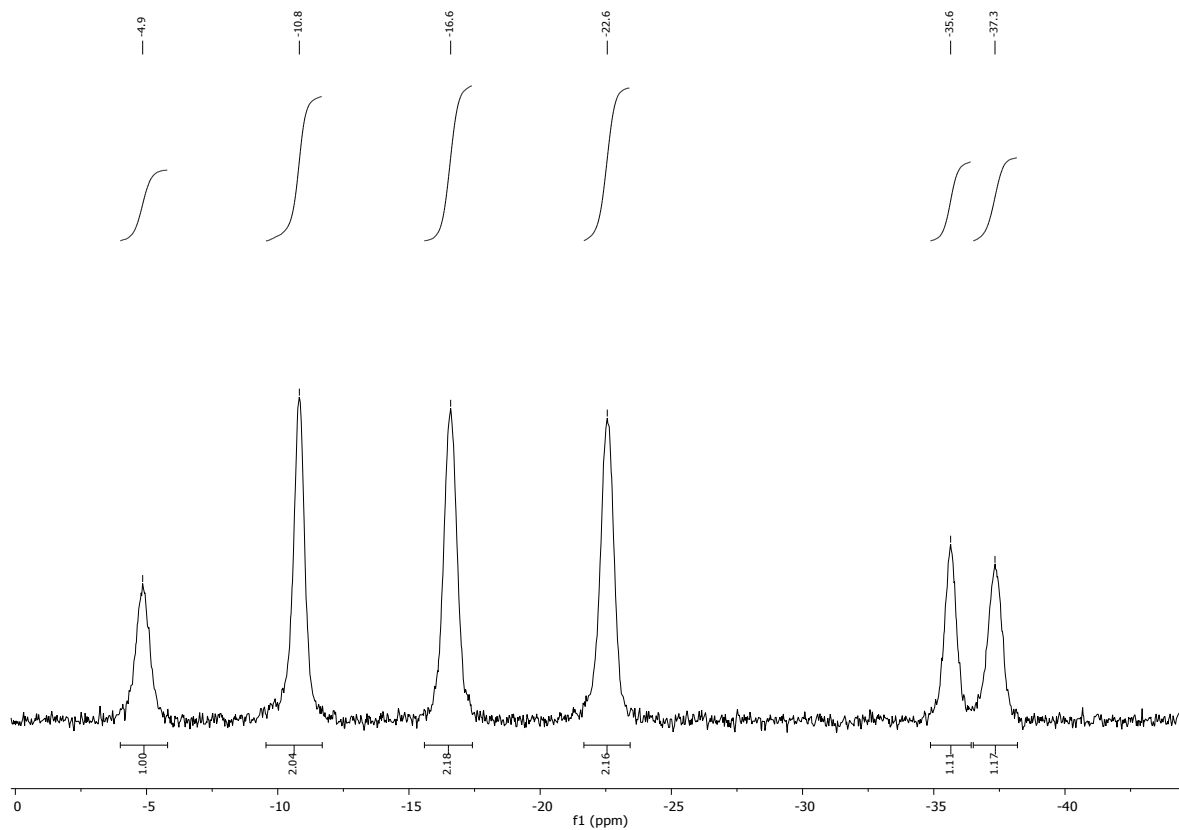

Fig. 26S.  $^{11}\text{B}\{^1\text{H}\}$  NMR spectrum of  $\text{Cs}[3-(2'\text{-MeC}_6\text{H}_4\text{N}=\text{N})\text{-}7,8\text{-C}_2\text{B}_9\text{H}_{11}]$  (**6**).

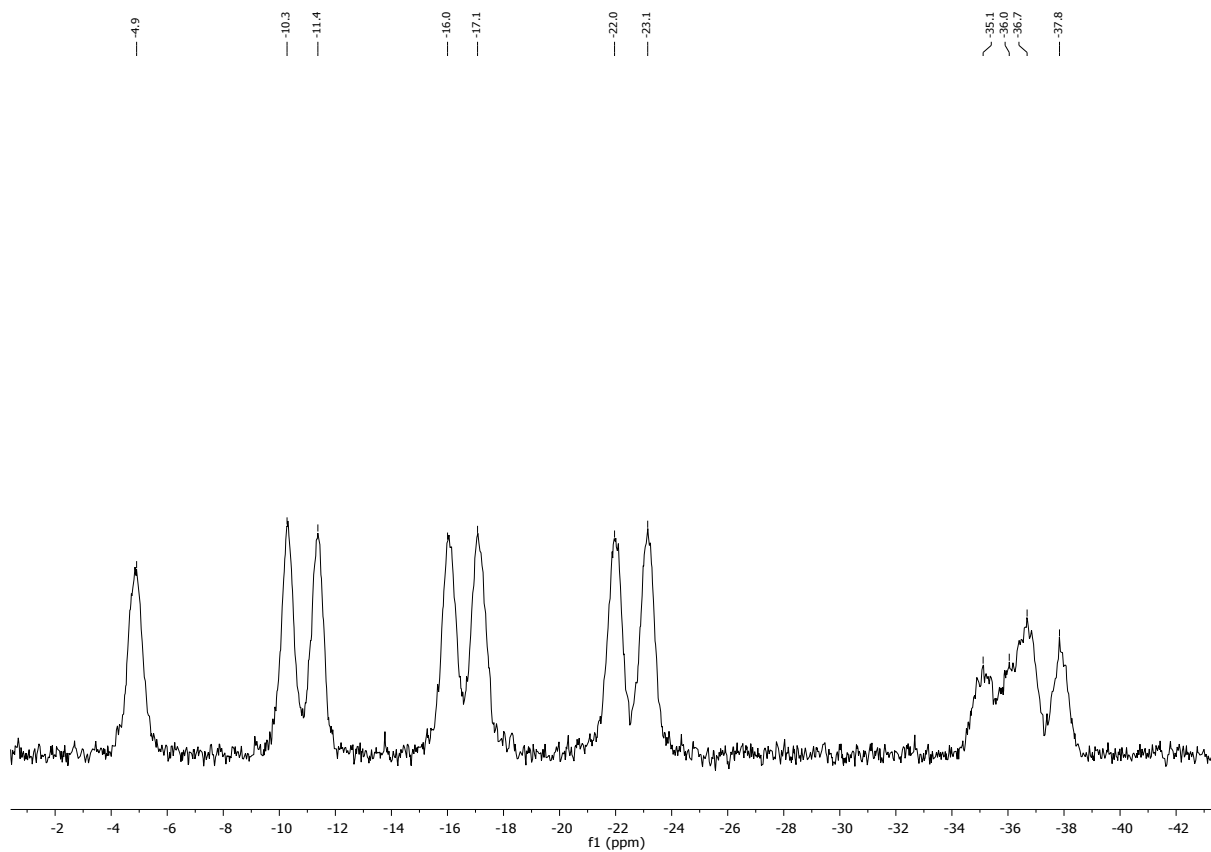

Fig. 27S.  $^{11}\text{B}$  NMR spectrum of  $\text{Cs}[3-(2'\text{-MeC}_6\text{H}_4\text{N}=\text{N})\text{-}7,8\text{-C}_2\text{B}_9\text{H}_{11}]$  (**6**).

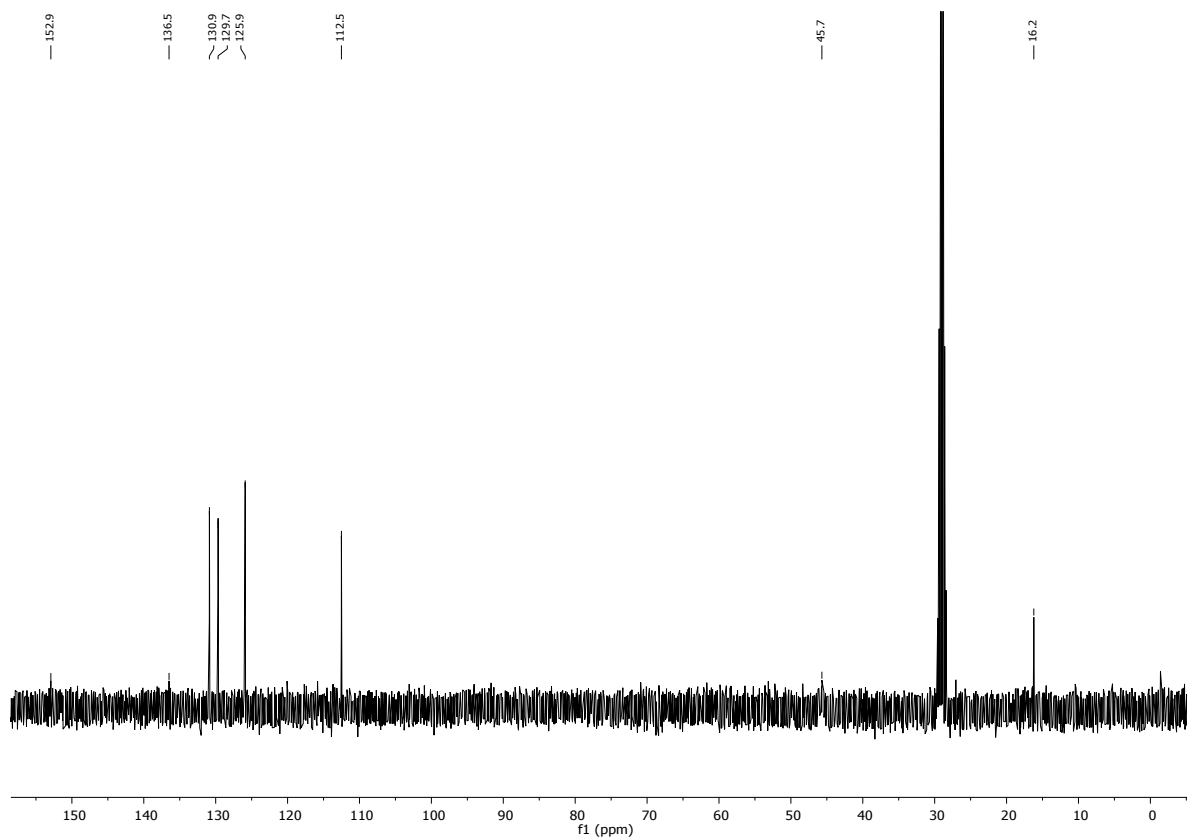

Fig. 28S.  $^{13}\text{C}\{^1\text{H}\}$  NMR spectrum of  $\text{Cs}[3-(2'\text{-MeC}_6\text{H}_4\text{N}=\text{N})\text{-}7,8\text{-C}_2\text{B}_9\text{H}_{11}]$  (**6**).

Table S1. <sup>1</sup>H NMR chemical shifts of the *p*-MeOC<sub>6</sub>H<sub>4</sub> group in the corresponding arylazo derivatives of carboranes and arenes (in CDCl<sub>3</sub>).

| Compound                                                                                                                        | Chemical shifts, ppm | Reference |
|---------------------------------------------------------------------------------------------------------------------------------|----------------------|-----------|
| 1-( <i>p</i> -MeOC <sub>6</sub> H <sub>4</sub> )-N=N-1,2-C <sub>2</sub> B <sub>10</sub> H <sub>11</sub>                         | 7.74, 6.97, 3.89     | [7]       |
| 1-( <i>p</i> -MeOC <sub>6</sub> H <sub>4</sub> )-N=N-1,7-C <sub>2</sub> B <sub>10</sub> H <sub>11</sub>                         | 7.71, 6.94, 3.87     | [8]       |
| 1,2-( <i>p</i> -MeOC <sub>6</sub> H <sub>4</sub> ) <sub>2</sub> -N=N-1,7-C <sub>2</sub> B <sub>10</sub> H <sub>10</sub>         | 7.72, 6.94, 3.88     | [8]       |
| 1,7-( <i>p</i> -MeOC <sub>6</sub> H <sub>4</sub> ) <sub>2</sub> -N=N-1,7-C <sub>2</sub> B <sub>10</sub> H <sub>10</sub>         | 7.73, 6.95, 3.88     | [8]       |
| 1-( <i>p</i> -MeOC <sub>6</sub> H <sub>4</sub> )-N=N-3-Cp*-3,1,2-IrC <sub>2</sub> B <sub>9</sub> H <sub>10</sub>                | 7.69, 6.95, 3.88     | [9]       |
| 1-( <i>p</i> -MeOC <sub>6</sub> H <sub>4</sub> )-N=N-3-Cp*-3,1,2-RhC <sub>2</sub> B <sub>9</sub> H <sub>10</sub>                | 7.71, 6.95, 3.88     | [9]       |
| 1,2-( <i>p</i> -MeOC <sub>6</sub> H <sub>4</sub> ) <sub>2</sub> -N=N-3-Cp*-3,1,2-IrC <sub>2</sub> B <sub>9</sub> H <sub>9</sub> | 7.80, 7.00, 3.90     | [9]       |
| 3-( <i>p</i> -MeOC <sub>6</sub> H <sub>4</sub> )-N=N-1,2-C <sub>2</sub> B <sub>10</sub> H <sub>11</sub>                         | 7.80, 6.99, 3.88     | This work |
| <i>p</i> -MeOC <sub>6</sub> H <sub>4</sub> -N=N-C <sub>6</sub> H <sub>5</sub>                                                   | 7.93, 7.02, 3.89     | [10]      |
| <i>p</i> -MeOC <sub>6</sub> H <sub>4</sub> -N=N-C <sub>6</sub> H <sub>4</sub> - <i>p</i> -Me                                    | 7.90, 7.00, 3.88     | [10]      |
| <i>p</i> -MeOC <sub>6</sub> H <sub>4</sub> -N=N-C <sub>6</sub> H <sub>4</sub> - <i>p</i> -OMe                                   | 7.88, 6.99, 3.87     | [10]      |
| <i>p</i> -MeOC <sub>6</sub> H <sub>4</sub> -N=N-C <sub>6</sub> H <sub>4</sub> - <i>p</i> -F                                     | 7.91, 7.01, 3.89     | [10]      |
| <i>p</i> -MeOC <sub>6</sub> H <sub>4</sub> -N=N-C <sub>6</sub> H <sub>4</sub> - <i>p</i> -NO <sub>2</sub>                       | 7.97, 7.04, 3.92     | [11]      |
| <i>p</i> -MeOC <sub>6</sub> H <sub>4</sub> -N=N-C <sub>6</sub> H <sub>4</sub> - <i>p</i> -CF <sub>3</sub>                       | 7.95, 7.03, 3.91     | [11]      |
| <i>p</i> -MeOC <sub>6</sub> H <sub>4</sub> -N=N-C <sub>6</sub> H <sub>4</sub> - <i>p</i> -CN                                    | 7.98, 7.06, 3.94     | [11]      |
| <i>p</i> -MeOC <sub>6</sub> H <sub>4</sub> -N=N-C <sub>6</sub> H <sub>4</sub> - <i>p</i> -COOMe                                 | 7.93, 7.00, 3.87     | [12]      |

**X-ray experiments** for compounds **1**, **2**, **3** were carried out using SMART APEX2 CCD diffractometer ( $\lambda(\text{Mo-K}\alpha)=0.71073 \text{ \AA}$ , graphite monochromator,  $\omega$ -scans) at 120K. Collected data were processed by the SAINT and SADABS programs incorporated into the APEX2 program package [13]. The structures were solved by the direct methods and refined by the full-matrix least-squares procedure against  $F^2$  in anisotropic approximation. The refinement was carried out with the SHELXTL program [14]. The CCDC numbers (1995638, 1995639, 1995640 for **1**, **2**, **3**, respectively) contain the supplementary crystallographic data for this paper. These data can be obtained free of charge via [www.ccdc.cam.ac.uk/data\\_request/cif](http://www.ccdc.cam.ac.uk/data_request/cif).

**Crystallographic data for 1:** C<sub>10</sub>H<sub>21</sub>B<sub>10</sub>N<sub>3</sub> are triclinic, space group *P*-1:  $a = 13.4382(13) \text{ \AA}$ ,  $b = 14.3212(13) \text{ \AA}$ ,  $c = 19.2290(18) \text{ \AA}$ ,  $\alpha = 71.551(2)^\circ$ ,  $\beta = 89.699(2)^\circ$ ,  $\gamma = 75.284(2)^\circ$ ,  $V = 3383.9(6) \text{ \AA}^3$ ,  $Z = 8$ ,  $M = 291.40$ ,  $d_{\text{cryst}} = 1.144 \text{ g}\cdot\text{cm}^{-3}$ .  $wR2=0.1721$  calculated on  $F^2_{hkl}$  for all 14444 independent reflections with  $2\theta < 53.7^\circ$ , ( $GOF=1.008$ ,  $R=0.0627$  calculated on  $F_{hkl}$  for 8383 reflections with  $I > 2\sigma(I)$ ).

**Crystallographic data for 2:** C<sub>9</sub>H<sub>18</sub>B<sub>10</sub>N<sub>2</sub>O are monoclinic, space group  $P2_1/c$ :  $a = 12.3986(17)\text{\AA}$ ,  $b = 19.258(3)\text{\AA}$ ,  $c = 6.6169(9)\text{\AA}$ ,  $\beta = 99.327(3)^\circ$ ,  $V = 1559.1(4)\text{\AA}^3$ ,  $Z = 4$ ,  $M = 278.35$ ,  $d_{\text{cryst}} = 1.186\text{ g}\cdot\text{cm}^{-3}$ .  $wR2=0.1373$  calculated on  $F^2_{hkl}$  for all 2963 independent reflections with  $2\theta < 52^\circ$ , ( $GOF=0.989$ ,  $R=0.0522$  calculated on  $F_{hkl}$  for 1868 reflections with  $I > 2\sigma(I)$ ).

**Crystallographic data for 3:** C<sub>9</sub>H<sub>18</sub>B<sub>10</sub>N<sub>2</sub> are orthorhombic, space group  $Pbcn$ :  $a = 19.235(3)\text{\AA}$ ,  $b = 7.0992(11)\text{\AA}$ ,  $c = 21.796(3)\text{\AA}$ ,  $V = 2976.4(8)\text{\AA}^3$ ,  $Z = 8$ ,  $M = 262.35$ ,  $d_{\text{cryst}} = 1.171\text{ g}\cdot\text{cm}^{-3}$ .  $wR2=0.1561$  calculated on  $F^2_{hkl}$  for all 4170 independent reflections with  $2\theta < 59.2^\circ$ , ( $GOF=1.003$ ,  $R=0.0580$  calculated on  $F_{hkl}$  for 2265 reflections with  $I > 2\sigma(I)$ ).

Table S2. Selected bond lengths (Å) and torsion angles (°) of compounds **1**, **2**, **3**.

| Bond/Tors.angle | <b>1</b>  |           |           |           | <b>2</b>  | <b>3</b> | Mean Xray* |
|-----------------|-----------|-----------|-----------|-----------|-----------|----------|------------|
|                 | Mol. A    | Mol. A'   | Mol. A''  | Mol. (d)  |           |          |            |
| B8-B3-N1-N2     | -177.5(2) | -179.7(2) | 179.2(2)  | 178.1(2)  | -154.0(2) | 131.6(2) |            |
| B3-N1-N2-C3     | 179.1(2)  | 179.3(2)  | 179.6(2)  | -178.5(2) | 179.7(2)  | 177.7(2) |            |
| N1-N2-C3-C4     | -179.6(2) | 177.6(2)  | -178.4(2) | 177.8(2)  | 178.8(2)  | 157.9(2) |            |
| N2-C3           | 1.411(3)  | 1.407(3)  | 1.416(3)  | 1.416(3)  | 1.435(2)  | 1.432(2) |            |
| N1-N2           | 1.270(3)  | 1.274(3)  | 1.274(3)  | 1.271(3)  | 1.262(2)  | 1.259(2) |            |
| B3-N1           | 1.479(3)  | 1.482(3)  | 1.479(3)  | 1.488(3)  | 1.490(3)  | 1.491(3) |            |
| B3-C1           | 1.734(4)  | 1.736(4)  | 1.736(4)  | 1.739(4)  | 1.739(3)  | 1.718(3) | 1.722      |
| B3-C2           | 1.738(4)  | 1.735(4)  | 1.732(4)  | 1.727(4)  | 1.729(3)  | 1.727(3) | 1.722      |
| B3-B4           | 1.779(4)  | 1.771(4)  | 1.783(4)  | 1.775(4)  | 1.776(3)  | 1.771(3) | 1.773      |
| B3-B7           | 1.777(4)  | 1.783(4)  | 1.780(4)  | 1.779(4)  | 1.780(3)  | 1.785(3) | 1.773      |
| B3-B8           | 1.758(4)  | 1.758(4)  | 1.766(4)  | 1.759(4)  | 1.762(3)  | 1.762(3) | 1.765      |
| C1-C2           | 1.618(3)  | 1.627(3)  | 1.619(3)  | 1.631(3)  | 1.622(3)  | 1.630(3) | 1.676      |
| C1-B6           | 1.718(4)  | 1.719(4)  | 1.718(4)  | 1.721(4)  | 1.718(3)  | 1.717(3) | 1.722      |
| C2-B6           | 1.714(4)  | 1.720(4)  | 1.718(4)  | 1.730(4)  | 1.725(3)  | 1.715(3) | 1.722      |
| B5-B6           | 1.781(4)  | 1.776(4)  | 1.769(5)  | 1.769(4)  | 1.783(4)  | 1.780(3) | 1.773      |
| B6-B10          | 1.768(4)  | 1.767(4)  | 1.766(5)  | 1.766(4)  | 1.765(3)  | 1.776(3) | 1.765      |
| B6-B11          | 1.769(4)  | 1.778(4)  | 1.767(5)  | 1.781(4)  | 1.784(4)  | 1.781(3) | 1.773      |

\* statistically average bond lengths in X-ray studied carborane cages [15] are given for a comparison

## Calculations

Optimization of compound **1** has led to the structure being close to the experimental one and it is characterized by approximate  $C_s$  symmetry (the B8-B3-N1-N2 torsion angle is  $-179.9^\circ$ ) (Fig. S1). Redistribution of the bond lengths in carborane cage due to  $p$ -Me<sub>2</sub>NC<sub>6</sub>H<sub>4</sub>-N=N substituent is provided in Table 2S.

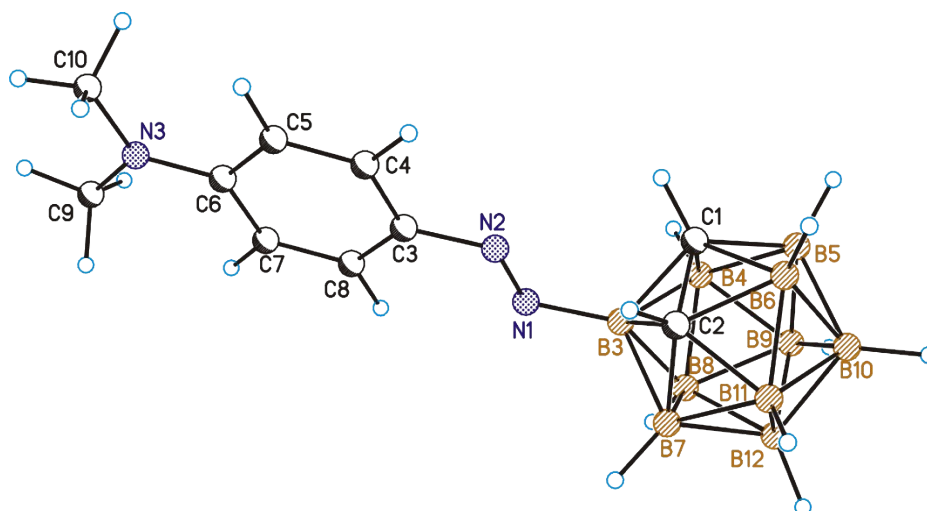

Fig. 29S. General view of optimized structure of compound **1**.

Table S3. Selected bond lengths (Å) for unsubstituted *ortho*-carborane and compound **1** as obtained from PBE0/6-311G(df,pd) calculation.

|        | <i>ortho</i> -carborane | Compound <b>1</b> |
|--------|-------------------------|-------------------|
| B3-C1  | 1.707                   | 1.722             |
| B3-C2  | 1.707                   | 1.722             |
| B3-B4  | 1.770                   | 1.772             |
| B3-B7  | 1.770                   | 1.771             |
| B3-B8  | 1.760                   | 1.761             |
| C1-C2  | 1.612                   | 1.602             |
| C1-B6  | 1.707                   | 1.703             |
| C2-B6  | 1.707                   | 1.703             |
| B5-B6  | 1.770                   | 1.771             |
| B6-B10 | 1.760                   | 1.762             |
| B6-B11 | 1.770                   | 1.771             |

## References

1. D. Zhao and Z. Xie, *Chem. Sci.*, **2016**, *7*, 5635.
2. U. Tilstam and H. Weinmann, *Org. Proc. Res. Dev.*, **2002**, *6*, 906-910.
3. N. Tsukahara, H. Asakawa, K.-H. Lee, Z. Lin and M. Yamashita, *J. Am. Chem. Soc.*, **2017**, *139*, 2593-2596.
4. W. L. F. Armarego and C. L. L. Chai, *Purification of Laboratory Chemicals*, Butterworth-Heinemann: Burlington, 2009.
5. J. Li and M. Jones, *Inorg. Chem.*, **1990**, *29*, 4162-4163.
6. R. M. Dziedzic, L. M. A. Saleh, J. C. Axtell, J. L. Martin, S. L. Stevens, A. T. Royappa, A. L. Rheingold and A. M. Spokoyny, *J. Am. Chem. Soc.*, **2016**, *138*, 9081-9084.
7. H.-H. Li, F. Bai, H. Yan and C.-S. Lu, *Org. Lett.*, **2017**, *19*, 862-865.
8. Y. Gao, S.-T. Guo, P.-F. Cui, F. Aznarez and G.-X. Jin, *Chem. Commun.*, **2019**, *55*, 210-213.
9. Y. Gao, P.-F. Cui, F. Aznarez and G.-X. Jin, *Chem. Eur. J.*, **2018**, *24*, 10357-10363.
10. C. Zhang and N. Jiao, *Angew. Chem. Int. Ed.*, **2010**, *49*, 6174-6177.
11. Z. Yang, S. Hou, W. He, B. Cheng, P. Jiao and J. Xu, *Tetrahedron*, **2016**, *72*, 2186-2195.
12. M. H. Davey, V. Y. Lee, R. D. Miller and T. J. Marks, *J. Org. Chem.*, **1999**, *64*, 4976-4979.
13. *APEX2* and *SAINT*. Bruker AXS Inc., Madison, Wisconsin, USA, **2014**.
14. G. M. Sheldrick, *Acta Crystallogr.*, **2015**, *C71*, 3-8.
15. T. V. Timofeeva, K. Yu. Suponitsky, A. I. Yanovsky and N. L. Allinger, *J. Organomet. Chem.*, **1997**, *536-537*, 481-488.
